# Supplementary material for: Identification of an Amylomaltase from the Halophilic Archaeon Haloquadratum walsbyi by Functional Metagenomics: Structural and Functional Insights
Source: MDPI journal article supplement (doi:10.3390/life12010085), 2022-01-07
Supplement: s1 [file s1]

## Supplementary materials

### **Identification of an amylomaltase from the halophilic archaeon *Haloquadratum walsbyi* by functional metagenomics: structural and functional insights.**

Claudia Leoni<sup>1</sup>, Caterina Manzari<sup>2</sup>, Tran Hai<sup>3</sup>, Peter N. Golyshin<sup>3</sup>, Graziano Pesole<sup>1,2</sup>, Mariateresa Volpicella<sup>1,2,\*</sup> and Luigi R. Ceci<sup>1,\*</sup>

<sup>1</sup>Institute of Biomembranes, Bioenergetics and Molecular Biotechnologies, Consiglio Nazionale delle Ricerche, 70126 Bari, Italy;

<sup>2</sup>Department of Biosciences, Biotechnologies and Biopharmaceutics, University of Bari Aldo Moro, 70126 Bari, Italy;

<sup>3</sup>Centre for Environmental Biotechnology, School of Natural Sciences, Bangor University, LL57 2UW Bangor, United Kingdom.

\* Correspondence: l.ceci@ibiom.cnr.it (L.R.C.); mariateresa.volpicella@uniba.it (M.V.);

Tel.: +39-080-544-3311 (L.R.C. & M.V.)

Content:

Table S1: **Amino acids of conserved regions in amylomaltases of *T. thermophilus* and *H. walsbyi*.**

Figure S1: **Figure S1. Clustal alignment of Hw-A and GH77 representative sequences.**

Figure S2: **Figure S2. Clustal alignment of Hw-A and 83 archaeal amylomaltases present in the CAZy GH77 family.**

Figure S3: **Figure S3. SDS-PAGE analysis of the fractions obtained from Ni-affinity chromatography.**

**Table S1. Amino acids of conserved regions in amylomaltases of *T. thermophilus* and *H. walsbyi*.**

|                                                                                      | <i>T. thermophilus</i><br>(O87172)                                           | <i>H. walsbyi</i><br>(MZ422727)                                            |
|--------------------------------------------------------------------------------------|------------------------------------------------------------------------------|----------------------------------------------------------------------------|
| ACTIVE SITE                                                                          |                                                                              |                                                                            |
| Catalytic residues                                                                   | D293<br>E340<br>D395                                                         | D345<br>E392<br>D445                                                       |
| <i>i)</i> Four conserved amino acids for substrate binding                           | Y59<br>D213<br>R291<br>H394                                                  | Y61<br>D266<br>R343<br>H444                                                |
| <i>ii)</i> Other conserved amino acids of the active site                            | F217<br>W258<br>H294<br>L342<br>N464                                         | Y270<br>W310<br>H346<br>L394<br>N508                                       |
| <i>iii)</i> Conserved amino acids forming part of the cleft around the active center | S57<br>P58<br>D341<br>G343<br>T393<br>P466                                   | S59<br>P60<br>D393<br>G395<br>T443<br>P510                                 |
| <i>iv)</i> 250s LOOP                                                                 | P247<br>P248<br>D249<br>Y250<br>F251<br>S252<br>E253<br>T254<br>G255<br>W302 | P300<br>P301<br>T302<br>D303<br>--<br>S304<br>D305<br>D306<br>G307<br>Y354 |
| SUBSTRATE BINDING SITE<br>SECONDARY                                                  | Y54<br>Y101<br>Y465                                                          | H56<br>R107<br>E509                                                        |

P15977\_Escherichia-coli  
Q6R608\_Solanum-tuberosum  
A030T7\_Lactococcus-lactis  
q6YM39\_Borrelia-burgdorferi  
B5RKZ2\_Borrelia-duttonii  
A1QYW1\_Borrelia-turicatae  
O87172\_Thermus-thermophilus  
UBZ54001\_Haloquadratum-walsbyi Mds

P15977\_Escherichia-coli  
Q6R608\_Solanum-tuberosum  
Q030T7\_Lactococcus-lactis  
A6YM39\_Borrelia-burgdorferi  
B5RKZ2\_Borrelia-duttonii  
A1QYW1\_Borrelia-turicatae  
O87172\_Thermus-thermophilus  
UBZ54001\_Haloquadratum-walsbyi Mds

P15977\_Escherichia-coli  
Q6R608\_Solanum-tuberosum  
Q030T7\_Lactococcus-lactis  
A4YM39\_Borrelia-burgdorferi  
B5RKZ2\_Borrelia-duttonii  
A1QYW1\_Borrelia-turicatae  
O87172\_Thermus-thermophilus  
UBZ54001\_Haloquadratum-walsbyi MdS

P15977\_Escherichia-coli  
Q6R608\_Solanum-tuberosum  
Q030T7\_Lactococcus-lactis  
A6YM39\_Borrelia-burgdorferi  
B5RKZ2\_Borrelia-duttonii  
A1QYW1\_Borrelia-turicatae  
O87172\_Thermus-thermophilus  
UBZ54001\_Haloquadratum-walsbyi Mds

P15977\_Escherichia-coli  
Q6R608\_Solanum-tuberosum  
Q030T7\_Lactococcus-lactis  
A6YM39\_Borrelia-burgdorferi  
B5RKZ2\_Borrelia-duttonii  
A1QYW1\_Borrelia-turicatae  
O87172\_Thermus-thermophilus  
UBZ54001\_Haloquadratum-walsbyi Mds

P15977\_Escherichia-coli  
Q6R608\_Solanum-tuberosum  
Q030T7\_Lactococcus-lactis  
A6YM39\_Borrelia-burgdorferi  
B5RKZ2\_Borrelia-duttonii  
A1QYW1\_Borrelia-turicatae  
O87172\_Thermus-thermophilus  
UBZ54001\_Haloquadratum-walsbyi MdS

P15977\_Escherichia-coli  
Q6R608\_Solanum-tuberosum  
Q030T7\_Lactococcus-lactis  
A6YM39\_Borrelia-burgdorferi  
B5RKZ2\_Borrelia-duttonii  
A1QYW1\_Borrelia-turicatae  
O87172\_Thermus-thermophilus  
UBZ54001\_Haloquadratum-walsbyi Mds

$\beta 4$   $\alpha 3$   
 WWQLPTTQQLQQARDADWVDYSTVTALKMTALRMAWKGAQR-----  
 IRE-----ARVQ-LDKKDDVDEACMATKLSIAKKIFAREKE-----  
 LLI-----LESELNSLEKIDYERCLALKWEYAQIIYQNLAV-----  
 L-----SLLKENETRYSDLKKLS-FDKFKLKEAALNFN-----  
 L-----GIFGCLDRCIDYDKLK-TKNIIILRDAALNFLH-----  
 L-----GTFCLEDYVDYDKLK-AKEVILRNAALNFLH-----  
 -----PGFPQGRVDYGLLYAWKWPALKEAFRGFKE-----  
 L-----EPVPDFSPHEVVYDVTREYKHDCQLIAAERFRESIGGIAIHPPHPDPDTT

|                                    |                                                               |     |     |
|------------------------------------|---------------------------------------------------------------|-----|-----|
| P15977_Escherichia-coli            | -----DDEQMAAFRQFVAEQGDSLFWQAADFAL                             | α4  | α5  |
| Q6R608_Solanum-tuberosum           | -----TILNSKSFQEFFSENQEWLKPAAFCFL                              |     |     |
| Q030T7_Lactococcus-lactis          | -----KYQKTSYQQFYKQNEEWLKAYACFSYL                              |     |     |
| A6YM39_Borrelia-burgdorferi        | -----RASADEVRSFEKFKKSSYWLDFASFVAF                             |     |     |
| B5RKZ2_Borrelia-duttonii           | -----RATIDEMYAFEKFKKSAAYWLDFSSSFVAF                           |     |     |
| A1QYW1_Borrelia-turicatae          | -----RATIDEIHAFEKFKKSAAYWLDFSSSFVAF                           |     |     |
| O87172_Thermus-thermophilus        | -----KASPEEREAAFAFREREAWLEDYALFMAL                            |     |     |
| UBZ54001_Haloquadratum-walsbyi_Mds | VNSGVDGDTVPEVTVTLGESVNLSQDTPADSQIEKDAREFKSFYQRENHWLTDYALFMAL  |     |     |
|                                    | . : * * : * :                                                 |     |     |
| P15977_Escherichia-coli            | HAQQVKEDEMRWG---PAWPEMYQNVDSPEVRQFCEEHRDDVDFYLWLQWLAYSQFAAC   | α6  | α7  |
| Q6R608_Solanum-tuberosum           | RNFFETSESRQWGRF---SEFSKEKL---EKLVSKESLHYEVVSFYIYIQFHLHLQLSEA  |     |     |
| Q030T7_Lactococcus-lactis          | RDINKSANFLAWGKN---ANYDKNLF---DKLKKET---SQLDLYIFVQYLLHSQSLTEA  |     |     |
| A6YM39_Borrelia-burgdorferi        | KEYFFK---ESKNAFNVLFDRGILKKNEKDLFKLRNLSKEIKVQEVLYQYFFFSQFQAL   |     |     |
| B5RKZ2_Borrelia-duttonii           | REYYCRF---QDPQTFNLLFSKEILKRDPKALMRLRETINVEINIQQVLQYFFFSQFQAL  |     |     |
| A1QYW1_Borrelia-turicatae          | KEYYSKF---QSSQAFNLLFSREILKRDAKALAKLRETLEVEINIQQVLQYFFFSQFQAL  |     |     |
| O87172_Thermus-thermophilus        | KGAGHGL---PW---NRWPLPLRKREEKALREAKSALAEVAFHAFTQWLFFRQWGAL     |     |     |
| UBZ54001_Haloquadratum-walsbyi_Mds | RTSYDG---AW---TDWPEPIRNRDPDALRDQYESLESVDLYHLVYQFIFDQQWQSL     |     |     |
|                                    | : : : : : *                                                   |     |     |
| P15977_Escherichia-coli            | WEISQGYEMPIGLYRDLAVGVAEGGAETWCDRELYCLK-----ASVGAPPDILGPLGQN   | β5  | α8  |
| Q6R608_Solanum-tuberosum           | AEYAR---KKGVVLLKGDLPIGVDRNSVDTWVYPNLFMRN-----TSTGAPPDYFDKNGQN |     | β6  |
| Q030T7_Lactococcus-lactis          | VDYCH---KLGIALKGDIAIGIAHDSVDATHPELPHLD-----KQAGAPPDVFAVNGQN   |     | β7  |
| A6YM39_Borrelia-burgdorferi        | KRYAN---DKGIELIMNVFFFIAYDSADVWAYQKYFKLRFDAKDKIAGISPDYFLEQEQA  |     |     |
| B5RKZ2_Borrelia-duttonii           | KRYAS---NVGIKIISDMPIFMFYDSADVWAHQKYFKLRFDAKDKVTGMPSGNLSYKKYL  |     |     |
| A1QYW1_Borrelia-turicatae          | KRYAN---NAGIKIVSDIPIFVSYSADVWAHQKYFKLRFDAKDKVTGVPDCLFSKKYL    |     |     |
| O87172_Thermus-thermophilus        | KAEAE---ALGIIRIGDMPIFVAEDSAEVWAHPWFHLEDEGRPTVVAGVPDPYFSETGQR  |     |     |
| UBZ54001_Haloquadratum-walsbyi_Mds | QTVAA---NRGVTLVGDLPIYVALDSADVWATPEIFQLTDTNEPAVVAGVPTD-SDDGQR  |     |     |
|                                    | . : : : : * : : : *                                           |     |     |
| P15977_Escherichia-coli            | WGLPPMDPHIITARAYEPFIELLRANMQNCALRIDHVSMLRLWWIPYGETADQ-----    | α9  | α10 |
| Q6R608_Solanum-tuberosum           | WGFPPTYNWEEMSKDNYGWWARLQTQMGKYFTAYRIDHILGFFRIWELPEHAMTGLCGKFR |     | β8  |
| Q030T7_Lactococcus-lactis          | WGFPPTYNWEKMAEDGYDWWKKRLTAMSNYFDAYRLDHLGFFRIWQMPENSVRGLLGQFS  |     | β9  |
| A6YM39_Borrelia-burgdorferi        | WDSAAYSWNVLKFKFYEWAKRIGVLRKYADIIKIDHFRGFVSTWEVSAGESYAF-----   |     |     |
| B5RKZ2_Borrelia-duttonii           | WGNAAYNWKALRKDDYVWWINRIGFMHKYVDIIFDYFRGFVSTWEISEREFSVYSS---   |     |     |
| A1QYW1_Borrelia-turicatae          | WGNAAYNWKALRKDDYVWWINRIDFLRKYVDIVRIDYFRGFVSTWEVSAEESLLF-----  |     |     |
| O87172_Thermus-thermophilus        | WGNPLYRWDVLEREGFSFWIRRLKALELFHLVRIDHFRGF EAYWEIPA SCPTAV----- |     |     |
| UBZ54001_Haloquadratum-walsbyi_Mds | WGNPVYDWAYLRNTGYNNWLDRLDRLFDLVDTVIDHFKGFDSSYAIPIADNPA-----    |     |     |
|                                    | *. : : : : : : : : : *                                        |     |     |
| P15977_Escherichia-coli            | -----GAY-----VHY---PV-----DDL                                 | β10 | α11 |
| Q6R608_Solanum-tuberosum           | PSIPISQEELESE-----GLWDFNRLTHPYIGQDLLQKFGASW-TIIASTFLNEYQKGF   |     |     |
| Q030T7_Lactococcus-lactis          | PALALSAAEEIENNYGIPFRQWGIERFILPFIKDWVIDEVFGRDNRDWIQTFLDYIGDSN  |     |     |
| A6YM39_Borrelia-burgdorferi        | -----NGLW-----VKS---PG-----RDF                                |     |     |
| B5RKZ2_Borrelia-duttonii           | -----SGQW-----VKC---PG-----KDF                                |     |     |
| A1QYW1_Borrelia-turicatae          | -----GGQW-----VKC---PG-----KDF                                |     |     |
| O87172_Thermus-thermophilus        | -----EGRW-----VKA---PG-----EKL                                |     |     |
| UBZ54001_Haloquadratum-walsbyi_Mds | -----AGEW-----HSV---PG-----YDF                                |     |     |
|                                    | :                                                             |     |     |
| P15977_Escherichia-coli            | LSIL-----AL-----                                              | β11 |     |
| Q6R608_Solanum-tuberosum           | YEFKDECNTEKKIASALKSFLETSMFVESEEKLRRLKFLDLLQNALIKDPEDPRKFYPRF  |     |     |
| Q030T7_Lactococcus-lactis          | YRFKAEFNNQKAIENT-----QMENWVREGLYKLQENVI FLKDDENSEKYHPRI       |     |     |
| A6YM39_Borrelia-burgdorferi        | FNFILNEI-----K-----DLK-----                                   |     |     |
| B5RKZ2_Borrelia-duttonii           | FRNVLSKI-----N-----DLE-----                                   |     |     |
| A1QYW1_Borrelia-turicatae          | FKQILNEI-----N-----DLE-----                                   |     |     |
| O87172_Thermus-thermophilus        | FQKIQEVF-----G-----EVP-----                                   |     |     |
| UBZ54001_Haloquadratum-walsbyi_Mds | FETVREHI-----G-----SLP-----                                   |     |     |
|                                    |                                                               |     |     |
| P15977_Escherichia-coli            | -----ESKRHRMVGIEDLG                                           |     |     |
| Q6R608_Solanum-tuberosum           | NVEDTTSFMDLDQHSQNVLKRLYYDYFHRQEGLRWDNAFKTLFVLLNSSDMLACGEDLG   |     |     |
| Q030T7_Lactococcus-lactis          | GLLSTISFREFGDDYKGRLERLYNDYFYGRNYDFWKEKAYEKLPAKLNATKMLACGEDLG  |     |     |
| A6YM39_Borrelia-burgdorferi        | -----IWVEDFQ                                                  |     |     |
| B5RKZ2_Borrelia-duttonii           | -----IWVEDLL                                                  |     |     |
| A1QYW1_Borrelia-turicatae          | -----IWVEDLV                                                  |     |     |
| O87172_Thermus-thermophilus        | -----VLAEDLG                                                  |     |     |
| UBZ54001_Haloquadratum-walsbyi_Mds | -----FIIEDLG                                                  |     |     |
|                                    | **:                                                           |     |     |

|                                    | α12                          | β12                    | α13                       | β13             | α14        |
|------------------------------------|------------------------------|------------------------|---------------------------|-----------------|------------|
| P15977_Escherichia-coli            | TVPVEIVGKLRSSGVSYKVLVFENDHEK | -TFRAPKAYPEQ           | --SMAVAATHDLPTLRGYW       |                 |            |
| Q6R608_Solanum-tuberosum           | LIPSCVHPVMQELGLVLGLRIQRMPS   | EPDV-EFGIPSQNYM        | --TVCAPSCHDCSTLRWW        |                 |            |
| Q030T7_Lactococcus-lactis          | MVPDNPVDMVYHLDILRLIIERMP     | ADERF-VSS-LSEVPYL      | --SVVTTSSHDTSPLRWW        |                 |            |
| A6YM39_Borrelia-burgdorferi        | NDLEDVSRRLRDFNFPGMKIMNLA     | FDFDSSNQNLPHNYIKN      | --CIVYTGSGDNDTIREFI       |                 |            |
| B5RKZ2_Borrelia-duttonii           | EDRGDAFRLRDYFNFPETRIMQFA     | DFDSDKNLCLPHNYIKN      | --CVVYTSTNESNTIRQFI       |                 |            |
| A1QYW1_Borrelia-turicatae          | KDRGDTFRLRDYFGFPGTKMMQCA     | FDFDSANIYLPHNYIRN      | --CVVYTGTHESNTIRGFI       |                 |            |
| O87172_Thermus-thermophilus        | VI                           | TPEVEALRDRFGLPGMKVLQFA | FDDGMENPFLPHNYPAHG        | RVVVVTGTHDND    | TTLGWY     |
| UBZ54001_Haloquadratum-walsbyi_MdS | FIDQALHDLREYFDFP             | GMRVPHYADWC            | REGDMYQPMHYPPQ            | --SVAYSSTHTD    | TDTIVGY    |
|                                    | ..                           | :                      | :                         | :               | :          |
|                                    | α15                          |                        |                           | α16             |            |
| P15977_Escherichia-coli            | ECGDLTLGKTLGLYPDEVVLRLGYQ    | DRELAKQGLLDALHKYGC     | LPKRAGHKASLMSMTPT         |                 |            |
| Q6R608_Solanum-tuberosum           | EEDEERRHRFF                  | -----QAVMGSD           | ELPPDQCTPE                | -----           |            |
| Q030T7_Lactococcus-lactis          | EENHDLTQRY                   | -----NEVMGWY           | GEAPNYASVE                | -----           |            |
| A6YM39_Borrelia-burgdorferi        | NSLDDLHKKYI                  | -----FDYLN             | -----TNENF                | -----           |            |
| B5RKZ2_Borrelia-duttonii           | NSVDDEHREYI                  | -----FNYFN             | -----TNEDF                | -----           |            |
| A1QYW1_Borrelia-turicatae          | NSVDNEHKKYI                  | -----FDYFN             | -----TSENA                | -----           |            |
| O87172_Thermus-thermophilus        | RTATPHEKAFM                  | -----ARYLADWG          | ITF-REEEE                 | -----           |            |
| UBZ54001_Haloquadratum-walsbyi_MdS | DSLSSQSRDCL                  | -----HYNLG             | -----VDGSE                | -----           |            |
|                                    |                              | :                      |                           |                 |            |
|                                    | β14                          | α17                    |                           | β15             |            |
| P15977_Escherichia-coli            | LNRGLQRYIADSN                | SALLGLQPEDWLDMAE       | -----PVNIPGTSYQYKN        | WRRKLSAT        |            |
| Q6R608_Solanum-tuberosum           | IVHFVLRQHVEAP                | SMWSIFPLQDLLALKEDY     | TRPAVEETINDPTNPKHY        | --WRYRVHVT      |            |
| Q030T7_Lactococcus-lactis          | IIQEIIRNLNSN                 | AMMVLPIQDWLAMSEH       | FRKENAKSEQINIPADPYHY      | --WNYRLHCN      |            |
| A6YM39_Borrelia-burgdorferi        | VVWDMIRSAMGS                 | VSDNVIVPMQDYINL        | GDKFS-----ANIPKSTLDN      | --CIFRLLES      |            |
| B5RKZ2_Borrelia-duttonii           | VVWDMIRGAMSS                 | VADNVIVSMEDYLDH        | VVDH-----KNVSGSMLND       | ----FRILSS      |            |
| A1QYW1_Borrelia-turicatae          | IVWDMIRGAMAS                 | VANSVIIPMKDYLDL        | VADFS-----MNISDAMLNN      | ----FRILSG      |            |
| O87172_Thermus-thermophilus        | VPWALMHLGMKS                 | VARLAVYP               | VQDVLALGSEAR              | -----MNYPGRPSGN | --WAWRLLPG |
| UBZ54001_Haloquadratum-walsbyi_MdS | INWSIIDAVWRSD                | AKIGLTTLQDVLGLD        | SHAR-----FNEPGTASGN       | --WEWRCTDS      |            |
|                                    | :                            | :                      | :                         | *               | :          |
|                                    | α18                          |                        |                           |                 |            |
| P15977_Escherichia-coli            | LESMFADDGVN                  | KKLDLDRRRRAAAKKK       | -----                     |                 |            |
| Q6R608_Solanum-tuberosum           | MESLLNDKDLTK                 | IKDLVRGSGRFYPQK        | DLESQAKLQLGSEHPSQTQYGLSNK |                 |            |
| Q030T7_Lactococcus-lactis          | LQALINQEWTD                  | FLKNFIKESKRAY          | -----                     |                 |            |
| A6YM39_Borrelia-burgdorferi        | D---                         | LDATLSQNISFLTRLYGRALE  | -----                     |                 |            |
| B5RKZ2_Borrelia-duttonii           | D---                         | LSTDLSKKISNITKLYGRI    | -----                     |                 |            |
| A1QYW1_Borrelia-turicatae          | D---                         | LSDDLSSKKISDITKLYGRT   | -----                     |                 |            |
| O87172_Thermus-thermophilus        | E---                         | LSPEHGARLRMAE          | ATERL-----                |                 |            |
| UBZ54001_Haloquadratum-walsbyi_MdS | G---                         | LDEDLARRLAGLT          | LEHVRD-----               |                 |            |
|                                    | .                            | :                      | :                         |                 |            |

**Figure S1. Clustal alignment of Hw-A and GH77 representative sequences.** Secondary structural elements highlighted in the *T. thermophilus* sequence were according to the 3D structure described by Przytylas et al. [1]. In particular, green regions refer to the (β/α)<sub>8</sub> barrel (subdomain A); the other coloured regions correspond to subdomains B2 (yellow), B1 (orange) and B3 (cyan). The three catalytic amino acids are reported in red. The non conserved amino acids in the sequences from borreliae discussed in the Introduction are shown in blue. The carbohydrate binding domains of *E. coli* [2] and potato [3] are highlighted in red.

1. Przytylas, I.; Tomoo, K.; Terada, Y.; Takaha, T.; Fujii, K.; Saenger, W.; Sträter, N. Crystal Structure of Amylomaltase from *Thermus Aquaticus*, a Glycosyltransferase Catalysing the Production of Large Cyclic Glucans. *Journal of Molecular Biology* **2000**, *296*, 873–886, doi:10.1006/jmbi.1999.3503.
2. Mareček, F.; Möller, M.S.; Svensson, B.; Janeček, Š. A Putative Novel Starch-Binding Domain Revealed by in Silico Analysis of the N-Terminal Domain in Bacterial Amylomaltases from the Family GH77. *3 Biotech* **2021**, *11*, 229, doi:10.1007/s13205-021-02787-8.
3. Lloyd, J.R.; Blennow, A.; Burhenne, K.; Kossmann, J. Repression of a Novel Isoform of Disproportionating Enzyme (StDPE2) in Potato Leads to Inhibition of Starch Degradation in Leaves But Not Tubers Stored at Low Temperature. *Plant Physiology* **2004**, *134*, 1347–1354, doi:10.1104/pp.103.038026.

Figure S2

|             |                                                              |
|-------------|--------------------------------------------------------------|
| AUV80673.1  | -----                                                        |
| QCC51341.1  | -----                                                        |
| QSG15659.1  | -----                                                        |
| QSG11910.1  | -----                                                        |
| QSG08987.1  | -----                                                        |
| QSG05483.1  | -----                                                        |
| QGN07616.1  | MHSIGPEWREEIDDSTKTQYPAGQDRRADEQGPQRDQKRADRPLARHVDEFGRCVEETVH |
| QSG11921.1  | -----                                                        |
| QSG08998.1  | -----                                                        |
| QSG05496.1  | -----                                                        |
| CCQ33055.1  | -----                                                        |
| QSG02731.1  | -----                                                        |
| AUX09035.1  | -----                                                        |
| QFU81686.1  | -----                                                        |
| AWB27107.1  | -----                                                        |
| QLC34969.1  | -----                                                        |
| ACV11232.1  | -----                                                        |
| QPV62520.1  | -----                                                        |
| QLH84085.1  | -----                                                        |
| QLH79093.1  | -----                                                        |
| QAU11732.1  | -----                                                        |
| QAY20111.1  | -----                                                        |
| QWC20591.1  | -----                                                        |
| QUO46499.1  | -----                                                        |
| QKG93724.1  | -----                                                        |
| QKY17977.1  | -----                                                        |
| ACM57093.1  | -----                                                        |
| AZQ14643.1  | -----                                                        |
| ATW89261.1  | -----                                                        |
| ABQ75827.1  | -----                                                        |
| QZX99028.1  | -----                                                        |
| QZP38174.1  | -----                                                        |
| QZY03180.1  | -----                                                        |
| AUG48211.1  | -----                                                        |
| AEM58055.1  | -----                                                        |
| AHB66799.1  | -----                                                        |
| AJF25101.1  | -----                                                        |
| AAV46825.1  | -----MDTIYMFAYP-----RRRVLT                                   |
| QCP91534.1  | -----                                                        |
| QUJ72368.1  | -----                                                        |
| UBZ54001.1  | -----                                                        |
| CCC40696.1  | -----                                                        |
| CAJ52690.1  | -----                                                        |
| QCJ48434.1  | -----                                                        |
| AHZ21176.1  | -----                                                        |
| AFK19479.1  | -----                                                        |
| AFK19479.2  | -----                                                        |
| QCQ75940.1  | -----                                                        |
| AKU07735.1  | -----                                                        |
| QOS11852.1  | -----                                                        |
| QIB78738.1  | -----                                                        |
| ADE05003.1  | -----                                                        |
| ADE05003.2  | -----                                                        |
| QCC48543.1  | -----                                                        |
| ADQ67101.1  | -----                                                        |
| QIQ76396.1  | -----                                                        |
| QIB74651.1  | -----                                                        |
| AIF04697.1  | -----                                                        |
| AIF05955.1  | -----                                                        |
| QEE14682.1  | -----                                                        |
| ADL19304.1  | -----                                                        |
| AMD30778.1  | -----                                                        |
| AKT33963.1  | -----                                                        |
| ABL88479.1  | -----                                                        |
| ACB39188.1  | -----                                                        |
| AEA11843.1  | -----                                                        |
| ABO08194.1  | -----                                                        |
| ABP49821.1  | -----                                                        |
| AFA40300.1  | -----                                                        |
| AAL63326.1  | -----                                                        |
| NP_559144.1 | -----                                                        |
| AET33957.1  | -----                                                        |
| ABD40312.1  | -----                                                        |
| QXO95450.1  | -----                                                        |
| QVV87979.1  | -----                                                        |

|            |                                                             |
|------------|-------------------------------------------------------------|
| CCJ37196.1 | -----                                                       |
| SAI88308.1 | -----                                                       |
| CVK34217.1 | -----                                                       |
| BBL68280.1 | -----                                                       |
| ABN57193.1 | -----                                                       |
| SAI88240.1 | -----                                                       |
| CVK34142.1 | -----                                                       |
| CCJ37132.1 | -----                                                       |
| BBL68006.1 | -----                                                       |
| ABN56987.1 | -----                                                       |
|            |                                                             |
| AUV80673.1 | -----MTLDRQSGVFC                                            |
| QCC51341.1 | -----MCYFQVRAAASREIRMDFDRQSGLFL                             |
| QSG15659.1 | -----MDFDRQSGLFL                                            |
| QSG11910.1 | -----MEFDRQSGLFL                                            |
| QSG08987.1 | -----MEFDRQSGLFL                                            |
| QSG05483.1 | -----MEFDRQSGLFL                                            |
| QGN07616.1 | QLREKRGHATTSQPGHLD---AWPGHSRPGVSRRESDLSRECRQPTGSMAFEKQSGVFL |
| QSG11921.1 | -----MSFERQSGVFL                                            |
| QSG08998.1 | -----MSFERQSGVFL                                            |
| QSG05496.1 | -----MSFERQSGVFL                                            |
| CCQ33055.1 | -----MSFERQSGVFL                                            |
| QSG02731.1 | -----MFA                                                    |
| AUX09035.1 | -----MTDFDRRSGVFC                                           |
| QFU81686.1 | -----MAAFDRRSGVFC                                           |
| AWB27107.1 | -----MALDRESGIFL                                            |
| QLC34969.1 | -----MNFERTSGVFC                                            |
| ACV11232.1 | -----MSFDRQSGVFL                                            |
| QPV62520.1 | -----MQQRRRSGVFL                                            |
| QLH84085.1 | -----MQQERRSGVFL                                            |
| QLH79093.1 | -----MQQERRSGVFL                                            |
| QAU11732.1 | -----MRFDRSDGVFC                                            |
| QAY20111.1 | -----MRFDRSDGVFC                                            |
| QWC20591.1 | -----MRFDRSDGVFC                                            |
| QUO46499.1 | -----MRFDRSDAVFC                                            |
| QKG93724.1 | -----MRFDRSDAVFC                                            |
| QKY17977.1 | -----MRFDRSAGVFC                                            |
| ACM57093.1 | -----MRLDRSGVFC                                             |
| AZQ14643.1 | -----MRLDRSGVFC                                             |
| ATW89261.1 | -----MDFDRQSGVFL                                            |
| ABQ75827.1 | -----MQFERQSGVFL                                            |
| QZX99028.1 | -----MRFDRRSGVLL                                            |
| QZP38174.1 | -----MRFDRRSGVLL                                            |
| QZY03180.1 | -----MRFDRRSGVLL                                            |
| AUG48211.1 | -----MQFERQSGVFL                                            |
| AEM58055.1 | -----MFL                                                    |
| AHB66799.1 | -----MQFERQSGVFL                                            |
| AJF25101.1 | -----MQFERQSGVFL                                            |
| AAV46825.1 | RIRRRSLLTGRSSPLALPRAAHFVRAPR-----EKPRPLKCLSGQQVRMQFERQSGVFL |
| QCP91534.1 | -----MQFERQSGVFL                                            |
| QUJ72368.1 | -----MQFERQSGVFL                                            |
| UBZ54001.1 | -----MQFDRQAGVFA                                            |
| CCC40696.1 | -----MQFDRQAGVFA                                            |
| CAJ52690.1 | -----MQFDRQAGVFA                                            |
| QCJ48434.1 | -----MRFDRQSGVFL                                            |
| AHZ21176.1 | -----MRFSRQSGVFM                                            |
| AFK19479.1 | -----MGLATESVSMRFSRQSGVFM                                   |
| AFK19479.2 | -----MRFSRQSGVFM                                            |
| QCQ75940.1 | -----MGLATESVSMRFSRQSGVFM                                   |
| AKU07735.1 | -----MRLSRQSGVFM                                            |
| QOS11852.1 | -----MRLSRQSGVFM                                            |
| QIB78738.1 | -----MRLSRQSGVFM                                            |
| ADE05003.1 | -----MGMRLSRQSGVFM                                          |
| ADE05003.2 | -----MRLSRQSGVFM                                            |
| QCC48543.1 | -----MRFDRRSGVFL                                            |
| ADQ67101.1 | -----MRFDRQSGVFA                                            |
| QIQ76396.1 | -----MRFDRQSGVFA                                            |
| QIB74651.1 | -----MRFDRQSGVFA                                            |
| AIF04697.1 | -----MAVEGTSKHYGSNGRRPFMRQAGVLC                             |
| AIF05955.1 | -----MAVEGTSKHYGSNGRRPFMRQAGVLC                             |
| QEE14682.1 | -----MELPRSAGILL                                            |
| ADL19304.1 | -----MERGSGLLL                                              |
| AMD30778.1 | -----MERGSGLLL                                              |
| AKT33963.1 | -----MLRGFGVLL                                              |
| ABL88479.1 | -----MLRGFGVLL                                              |
| ACB39188.1 | -----MLRGFGVLL                                              |
| AEA11843.1 | -----MLRGAGILL                                              |

|             |                  |
|-------------|------------------|
| ABO08194.1  | -----MLRGAGVLL   |
| ABP49821.1  | -----MLRGAGVLL   |
| AFA40300.1  | -----MLRGAGVLL   |
| AAL63326.1  | -----MLRGAGVLL   |
| NP_559144.1 | -----MLRGAGVLL   |
| AET33957.1  | -----MLRGAGILL   |
| ABD40312.1  | -----MKTRGSGILL  |
| QXO95450.1  | -----MKTRGCGTLL  |
| QVV87979.1  | -----MKTRGCGILL  |
| CCJ37196.1  | -----MNRRGSGVLL  |
| SAI88308.1  | -----MNRRGSGVLL  |
| CVK34217.1  | -----MNRRGSGVLL  |
| BBL68280.1  | -----MNRRGSGVLL  |
| ABN57193.1  | -----MNRRSSGVLL  |
| SAI88240.1  | -----MIHTRGSGILL |
| CVK34142.1  | -----MIHTRGSGILL |
| CCJ37132.1  | -----MIHTRGSGILL |
| BBL68006.1  | -----MIQTRGSGILL |
| ABN56987.1  | -----MIQTRGSGILL |

:

|            |                                                               |
|------------|---------------------------------------------------------------|
| AUV80673.1 | HVASLPGPGGIGSLGAPARRFVDFLARADQSLWQFCPIGPTTVDYGNPSYALSAVAGNP   |
| QCC51341.1 | HVASLPGPDGIGTLGEPAEFTFVDFLAESGQSLWQFCPLGPTIPIHDNSPYQSYSAFAGNP |
| QSG15659.1 | HVASLPGPDGIGTLGDPKATFVDFLADSGQSLWQFCPLGPTIPIHDNSPYQSYSAFAGNP  |
| QSG11910.1 | HIASLPGPDGIGTLGDPAEFTFVDFLADSGQSLWQFCPLGPTIPIHDNSPYQSYSAFAGNP |
| QSG08987.1 | HIASLPGPDGIGTLGDPAEFTFVDFLADSGQSLWQFCPLGPTIPIHDNSPYQSYSAFAGNP |
| QSG05483.1 | HIASLPGPDGIGTLGDPAEFTFVDFLADSGQSLWQFCPLGPTIPIHDNSPYQSYSAFAGNP |
| QGN07616.1 | HVSSLPGPDGIGTLGAPAEFTFVDFLATAEQSLWQTCPIGPTDPDVGNPSYSAVSARAGNP |
| QSG11921.1 | HVSSLSGPDGIGTLGEPAEHFVEYLETAEQSLWQTCPIGPTDPRQGNPSYSSFSARAGNP  |
| QSG08998.1 | HVSSLSGPDGIGTLGEPAEHFVEYLETAEQSLWQTCPIGPTDPRQGNPSYSSFSARAGNP  |
| QSG05496.1 | HVSSLSGPDGIGTLGEPAEHFVEYLETAEQSLWQTCPIGPTDPRQGNPSYSSFSARAGNP  |
| CCQ33055.1 | HVSSLPGPDGIGTLGQPAREFVDFLVEDQSLWQTCPIGPTDAGQGNPSYSAVSARAGNP   |
| QSG02731.1 | HPTSLPSSHGIGSIGQPSREFVDTLAEADQSLWQFCPLGPTISSIHGNSPYQAYSFAIEP  |
| AUX09035.1 | HPTALPGPGGIGTLGEPARGFLDRITEAGQSLWQFCPLGPTVGIHGNSPYQTCSAFAIDP  |
| QFU81686.1 | HPTALPGPHGIGSIGAPARSFVETIAAAGQSLWQFCPLGPTVGIHGDSPYQSSSSFLSP   |
| AWB27107.1 | HLSSLPGPHGIGDLGAT-TAVLDWLDRADQSVWQVCPINPTQGVHGHSPYASVSTFAGNP  |
| QLC34969.1 | HLTSLPGGHGIGDLGAGARAFDLFLDAADQSLWQFCPLGPTTGVHGHSPYSSPSTFAGNP  |
| ACV11232.1 | HLTSLPSPHGIGDLGDGARTFLDFLERAEQSLWQFCPVTPTRGVHGHSPYASPSAFAGNP  |
| QPV62520.1 | HLTSLPGPHGVGDLGAGARTFLDFLDRADQSLWQFCPVGPTSDAYGHSPYQSSSAFAGNP  |
| QLH84085.1 | HLTSLPGPHGVGDLGAGAREFLDFLDRADQSLWQFCPVGPTSAAYGHSPYQSSSAFAGNP  |
| QLH79093.1 | HLTSLPGPHGVGDLGAGAREFLDFLDRADQSLWQFCPVGPTSAAYGHSPYQSSSAFAGNP  |
| QAU11732.1 | HVTSPLPGAYGIGDLGGGAREFLSFLGDADVDHWQICPIGPTLSVAGESPYQSPSAFAGNP |
| QAY20111.1 | HVTSPLPGAYGIGDLGEGARDFLSFLGDADVDHWQICPIGPTLSVAGESPYQSPSAFAGNP |
| QWC20591.1 | HVTSPLPGAYGIGDLGQGAREFLSFLGDAGVDHWQICPIGPTLSVAGESPYQSPSAFAGNP |
| QUO46499.1 | HVTSPLPGAYGIGDLGEGAREFLSFLGDAGVDHWQICPIGPTISAAGESPYQSPSAFAGNP |
| QKG93724.1 | HVTSPLPGAYGIGDLGEGARDFLSFLGDAGVDHWQICPFGPTLSVAGESPYQSPSAFAGNP |
| QCY17977.1 | HVTSPLGRHGIGDLGDGAAAFLSFLGDADVDYQWQICPVGPTTDGAGESPYQSPSAFAGNP |
| AKM57093.1 | HVTSPLGRHGIGDLGDGAKAFLSFLGDADIGHWQVCPLGPTMGAAGESPYQSPSAFAGNP  |
| AZQ14643.1 | HVTSPLGRHGIGDLGDGAREFLSFLGDADVGHWQICPLGPTIGAAGESPYQSPSAFAGNP  |
| ATW89261.1 | HLTSLPGPHGIGDLGDGAREFLSFLQQAQACWQFCPLGPTSSAHGNSPYQSSSAFAGNP   |
| ABQ75827.1 | HITALPGPHGIGDLGEGAHEYIDWLASANQSVWQFCPIGPTASIHGNSPYQSYSAFAGNP  |
| QZX99028.1 | HPTALPGPYGIGDLGAGARSFLDFLDRADQSIWQVCPLGPTVGIHGHSPYQTFSGFAGNP  |
| QZP38174.1 | HPTALPGPHGIGDLGAGARSFLEFLDRADQSIWQVCPLGPTVGIHGHSPYQTFSGFAGNP  |
| QZY03180.1 | HPTALPGPHGIGDLGAGARSFLEFLDRADQSIWQVCPLGPTVGIHGHSPYQTFSGFAGNP  |
| AUG48211.1 | HLTSLPGPHGIGDLGSGARAFVDFLDRADQSLWQFCPLGPTASIHGNSPYQSSSAFAGNP  |
| AEM58055.1 | HQTSPLPGPHGIGDLGAGARAFVDFLDRADQSLWQFCPLGPTASIHGNSPYQSSSAFAGNP |
| AHB66799.1 | HQTSPLPGPHGIGDLGAGARAFVDFLDRADQSLWQFCPLGPTASIHGNSPYQSSSAFAGNP |
| AJF25101.1 | HQTSPLPGPHGIGDLGAGAWAFVDFLDRADQSLWQFCPLGPTASIHGNSPYQSSSAFAGNP |
| AAV46825.1 | HLTSLPGPHGIGDLGAGARAFVDFLDRADQSLWQFCPLGPTASIHGNSPYQSSSAFAGNP  |
| QCP91534.1 | HLTSLPGPHGIGDLGAGARAFVDFLDRADQSLWQFCPLGPTASIHGNSPYQSSSAFAGNP  |
| QUJ72368.1 | HLTSLPGPHGIGDLGAGARAFVDFLDRADQSLWQFCPLGPTASIHGNSPYQSSSAFAGNS  |
| UBZ54001.1 | HITALPGSHGIGDLGPGARKFLEWLETANQSVWQFCPLGPTAGIHDDSPYQSYSAFAGNP  |
| CCC40696.1 | HITALPGPHGIGDLGPGARNFLEWLETANQSVWQFCPLGPTAGIHDDSPYQSYSAFAGNP  |
| CAJ52690.1 | HITALPGPHGIGDLGPGARNFLEWLETANQSVWQFCPLGPTAGIHDDSPYQSYSAFAGNP  |
| QCJ48434.1 | HVSSLPGPHGIGDLGDGARAFVDFLADADQSLWQFCPLGPTSSAHGNSPYQSSSAFAGNP  |
| AHZ21176.1 | HVTSVPGPHGIGDLGDGAHAFVDFLAHAEQSMWQFCPLGPTSPVHANSPYQSASSFAGNP  |
| AFK19479.1 | HVTSVPGPHGIGDLGDGAHAFVDFLAHAEQSMWQFCPLGPTSPVHANSPYQSASSFAGNP  |
| AFK19479.2 | HVTSVPGPHGIGDLGDGAHAFVDFLAHAEQSMWQFCPLGPTSPVHANSPYQSASSFAGNP  |
| QCQ75940.1 | HVTSVPGPHGIGDLGDGAHAFVDFLAHAEQSMWQFCPLGPTSPVHANSPYQSASSFAGNP  |
| AKU07735.1 | HVTSVPGPHGIGDLGDGARAFVDFLSDAEQSMWQFCPLGPTSPVHANSPYQSTSSSFAGNP |
| QOS11852.1 | HVTSVPGPHGIGDLGDGARAFVDFLSDAEQSMWQFCPLGPTSPVHANSPYQSTSSSFAGNP |
| QIB7738.1  | HVTSVPGPHGIGDLGDGARAFVDFLADAEQSMWQFCPLGPTSPVHANSPYQSTSSSFAGNP |
| ADE05003.1 | HVTSVPGPHGIGDLGDGARAFVDFLADAEQSMWQFCPLGPTSPVHANSPYQSTSSSFAGNP |
| ADE05003.2 | HVTSVPGPHGIGDLGDGARAFVDFLADAEQSMWQFCPLGPTSPVHANSPYQSTSSSFAGNP |
| QCC48543.1 | HLTSLPGPHGIGDLGGGARAFVDFLDAEQSYWQFCPLGPTAPVHGDSPYQAYSFAFAGNP  |
| ADQ67101.1 | HVPSLPGPHGIGDLGDGARAFIDWLASAEQSLWQFCPLGPTASIHGNSPYQSYSAFAGNP  |
| QIQ76396.1 | HVPSLPGPHGIGDLGDGARAFVDFLDAEQSLWQFCPLGPTASIHGNSPYQSYSAFAGNP   |
| QIB74651.1 | HVPSLPGPHGIGDLGDGARAFVDFLDAEQSLWQFCPLGPTASIHGNSPYQSYSAFAGNP   |



|             |                                                                   |
|-------------|-------------------------------------------------------------------|
| AIF04697.1  | HLTSLPSQ---TLGEDAHRFCRLLSQIGCSVWQMLPLTPP--DEHGSPYASYSFAFVWD       |
| AIF05955.1  | HLTSLPSQ---TLGEDAHRFCRLLSQIGCSVWQMLPLTPP--DEHGSPYASYSFAFVWD       |
| QEE14682.1  | HPTSVYTRYGIGDLGPDITQFIEFLKASSQHFQVLPIGPT--GYADSPYQTISAFAGNP       |
| ADL19304.1  | HITSPLPGSPLVGLGPSAHEFLEILRDAGQRYWQVPLPLSPTAPEHDNSPYSGLSAFAGNP     |
| AMD30778.1  | HVTSPLPGSPLVGLGPSAHEFLELLREAGQRYWQVPLPLSPTAPEHDNSPYSGLSAFAGSP     |
| AKT33963.1  | PVFSPLPGGCHVGDMGPEAYKFAEFLADAEATYWQVPLPLGHTAPEYDDSPYSALSMLAGNP    |
| ABL88479.1  | HISLPLGGCLAGDLGPSAYKFAEFLSKAEATYWQILPLSHTLPEYDDSPYSAVSLLAGNP      |
| ACB39188.1  | HISLPLGGCLVGLGPSAYRFADFLSEAEATYWQILPLSHTLPEYDDSPYSAASLLAGNP       |
| AEA11843.1  | PLFSLPGPHGIGDMGPAAYRFVEFLRDAGQTYWQILLPLNPVLPEYDNPSPYSSTSSFAGEP    |
| ABO08194.1  | HITSPLPGGCHVGDLGPEAYAFAEALAYAEQTYWQTLPLNHTLPEYENSPYSAASSFAGDP     |
| ABP49821.1  | HITSPLPGGCVVGDGPEAYKFAEFLAEAEQTYWQTLPLNHSVPEYENSPYSAVSSFAGDP      |
| AFA40300.1  | HITSPLPGGCVVGDGPEAYKFAEFLAEAEQTYWQTLPLNHSVPEYENSPYSAVSSFAGDP      |
| AAL63326.1  | HITSPLPGGCFVGDGPEAYKFADSLAYAEQTYWQTLPLNHTVPEYENSPYSAVSSYAGDP      |
| NP_559144.1 | HITSPLPGGCFVGDGPEAYKFADSLAYAEQTYWQTLPLNHTVPEYENSPYSAVSSYAGDP      |
| AET33957.1  | HITSPLPGGYGIGDLGPEAYKFAEGLADAGQTYWQTLPLNHTLPEYENSPYNNAVSSFAGDP    |
| ABD40312.1  | HITSPLPGQFGIGDLGPQADRFVDFLQASGQRYWQILPVHPTDIRYDNPSPYHSISAFAGNP    |
| QXO95450.1  | HITSIPTKFGIGDLGPAAYRFVEFLQKAGQRYWQVPLPLHPTHEMYDNPSPYHALSAFAGNP    |
| QVV87979.1  | HITSIPTQFGIGDLGPAAYRFVEFLQKAGQRYWQVPLPLHPTENMYDNPSPYHALSAFAGNP    |
| CCJ37196.1  | HITSPLSPYGYGIGDLGPAAHRFVDDLALAGAGQRYWQILPLNPTCPDLGNSPYLSTSAFAGNP  |
| SAI88308.1  | HITSPLSPYGYGIGDLGPAAHRFVDDLALAGAGQRYWQILPLNPTCPDLGNSPYQSTSAFAGNP  |
| CVK34217.1  | HITSPLSPYGYGIGDLGPAAHRFVDDLALAGAGQRYWQILPLNPTCPDLGNSPYQSTSAFAGNP  |
| BBL68280.1  | HITSPLSPYGYGIGDLGPAAYRFVDDLALAGAGQRYWQILPLNPTCPEFANSPYQGSTSAFAGNP |
| ABN57193.1  | HVTSPLSPYGYGIGDLGPAAYRFVDDLALAGAGQRYWQILPLNPTCPEFANSPYQGSTSAFAGNP |
| SAI88240.1  | HITSPLSPYGYGIGDFGPSAYRFVEALAKARQHYWQILPLNPTRVEHASSPYSPSAFGMNT     |
| CVK34142.1  | HITSPLSPYGYGIGDFGPSAYRFVEALAKARQHYWQILPLNPTRVEHASSPYSPSAFGMNT     |
| CCJ37132.1  | HITSPLSPYGYGIGDFGPSAYRFVEALAKARQHYWQILPLNPTRVEHASSPYSPSAFGMNT     |
| BBL68006.1  | HITSPLSPYGYGIGDFGPSAYRFVEALAKARQHYWQILPLNPTAEAAHSPYSPSAFAANT      |
| ABN56987.1  | HITSPLSPYGYGDFGPAAYRFVDALERGRQHYWQILPLNPTETAYAHSPYSPSAFAANI       |

: : \* : \* \* . \*\*\* \* .

|            |                                                          |
|------------|----------------------------------------------------------|
| AUV80673.1 | LFVLDLADLRERGLERVEGE-----PFDDECVEYERVTDHVEETH            |
| QCC51341.1 | LFVLDLRLVERGWLDLED-----RP-----DFDDGHVEYGPVREYKEAR        |
| QSG15659.1 | LFIDLDLDELVERGWLEDLD-----RP-----DFDDGNVEYGPVREYKEAR      |
| QSG11910.1 | LFLDLDDLVERGWLEELD-----RP-----DFNDANVEYEPVREFKEAR        |
| QSG08987.1 | LFLDLDDLVERGWLEELD-----RP-----DFDDANVEYEPVREFKEAR        |
| QSG05483.1 | LFLDLDDLVERGWLEELD-----RP-----DFDDANVEYGPVREFKEAR        |
| QGN07616.1 | LFIDLDLALVDRGWLADLD-----RP-----GFDEREVEYDRVDAFKQEA       |
| QSG11921.1 | LFIELDLALVEEGWLDDPD-----RP-----DFDDREVEYERVMAFKREA       |
| QSG08998.1 | LFIELDLALVEEGWLDDPD-----RP-----DFDDREVEYERVMAFKREA       |
| QSG05496.1 | LFIELDLALAEEGWLDDPD-----RP-----DFDDREVEYERVMAFKREA       |
| CCQ33055.1 | LFIELDPLVEAGWLDEPD-----RP-----DFDDREVEYFGRVRPFKQGA       |
| QSG02731.1 | LLIDLDLVLVEQELLTPQEVTPE-----PFPNEYVDYDAVREFKYPL          |
| AUX09035.1 | LLIDLELIERGLLSGNRVETER-----DDA-----RLSDDRVDYDAVRKYRPL    |
| QFU81686.1 | LLIDLEALNERGLLTDDALEPDP-----ELDH-----ELTDDRVDYDAVRSFKTSR |
| AWB27107.1 | LFVDLTDLVDRGWLSADALAD-----AP-----R--TDRVDYDRVVPFTEDC     |
| QLC34969.1 | LLLDLHALRDQGWLTDAELEA-----PA-----AAEPTRVDYEAVAAPFKRER    |
| ACV11232.1 | LLVDLTALVERGWLDEETLEN-----PP-----G-DPRTVQYDVTDFKRER      |
| QPV62520.1 | LLVDLTDLVDRGYLDESDDLGD-----PE-----GTEPGSVNYEVVAPFVRDR    |
| QLH84085.1 | LLVDLVDLADRGYLDSDLDG-----PE-----GAEPGSVNYEAVAPFKRQR      |
| QLH79093.1 | LLVDLVDLADRGYLDADLDG-----PE-----GAEAGSVNYEVVAPFVRDR      |
| QAU11732.1 | LLVDLDGLVDDGWLDEGDLRP-----VP-----EFFVDRVDYDAVREYKLPL     |
| QAY20111.1 | LFVDPEGLVDDGWLDEGDLRP-----VP-----DFPTDRVDYEAVREYKLPL     |
| QWC20591.1 | LFVDPDGLVADGWLDEGDLRP-----VP-----EFFPADRVYDAVREYKLPL     |
| QUO46499.1 | LFVDPDGLVDDGWLDEDDLRP-----VP-----DFPTDRVDYDAVREYKLPL     |
| QKG93724.1 | LFVDPDGLVADGWLDEGDLTP-----VP-----DFPTDRVDYDAVREYKLPL     |
| KQY17977.1 | LLIDLGLAADGWLDEADLEP-----AP-----EFFPTDRVDYAAVREYKLPL     |
| ACM57093.1 | LLIDLGLVDDGWLDESLEP-----IP-----DFPEDRVYDAVREYKQPL        |
| AZQ14643.1 | LLIDLGLVDDGWLDESLEP-----AP-----DFPSDRVDYEAVRGYKEPL       |
| ATW89261.1 | LLISLDRDLVDDGWLTDEDLQP-----VP-----DFDEHSVDYEAVGDKRNPQ    |
| ABQ75827.1 | LLVSLDGLTSEQAYFSLNDVSI-----DA-----PDARHEVEYDAVREFKTA     |
| QZX99028.1 | LLIDLVDLAERGYLDEEIDVDA---GGDGAGV-----DFSLEHVRYDAVESFKLDR |
| QZP38174.1 | LLIDLVDLAERGYLDDEAAPDAG-----ESV-----DFSPEHVRYDAVESVKLDR  |
| QZY03180.1 | LLIDLVDLAERGYLEDELAEGDSTGEPDRDA-----DFSREHVHYHAVESVKLDR  |
| AUG48211.1 | LLIDLRLDLVDRGYLTADVEVP-----PG-----DFSQQQVNYDRVTEFTERR    |
| AEM58055.1 | LLIDLRLDLVDRGYLTADVEVP-----PE-----DFSQQHVKYDRVTEFKERR    |
| AHB66799.1 | LLIDLRLDLVDRGYLTADVEVP-----PE-----DFSQQHVKYDRVTEFKERR    |
| AJF25101.1 | LLIDLRLDLVDRGYLTADVEVP-----PE-----DFSQQHVKYDRVTEFKERR    |
| AAV46825.1 | LLIDLRLDLVDRGYLTADTEP-----PD-----DFSQQQVNYDRVTEFKEAR     |
| QCP91534.1 | LLIDLRLDLVDRGYLTADTEP-----PD-----DFSQQQVNYDRVTEFKEAR     |
| QUJ72368.1 | LLIDLRLDLVDRGYLTADTEP-----PD-----DFSQQQVNYDRVTEFKEAR     |
| UBZ54001.1 | LLISLDDLVAEGYLTSEDLEP-----VP-----DFSPEHVYDTRVREYKHDC     |
| CCC40696.1 | LIISLDDLVDAGGYLTSEDLEP-----VP-----DFSPEHAYDAVREYKHDR     |
| CAJ52690.1 | LIISLDDLVDAGGYLTNEDLKP-----VP-----DFSPEHAYDAVREYKHDR     |
| QCJ48434.1 | LFVDLRLDLDRGLTGDGLKP-----VP-----EFDPHETDYQVRVSEYKRPL     |
| AHZ21176.1 | LLVDLTDLLEARGWLTADDLEP-----VP-----DFDDHAYEYERVGNKYKRSR   |
| AFK19479.1 | LLVDLTDLLEARGWLTADDLEP-----VP-----DFDDHAYEYERVGNKYKRSR   |
| AFK19479.2 | LLVDLTDLLEARGWLTADDLEP-----VP-----DFDDHAYEYERVGNKYKRSR   |
| QCQ75940.1 | LLVDLTDLLEARGWLTADDLEP-----VP-----DFDDHAYEYERVGNKYKRSR   |

|             |                                                         |
|-------------|---------------------------------------------------------|
| AKU07735.1  | LLIDLTLVERGWLTEDDLEP-----VP-----DFDPHAVDYERVGEYKRSR     |
| QOS11852.1  | LLIDLTLVERGWLTDDDDLEP-----VP-----DFDPHAVDYERVGEYKRSR    |
| QIB78738.1  | LLIDLTLVARGWLTADLEP-----VP-----DFDPHAVDYERVGEYKRSR      |
| ADE05003.1  | LLIDLTLVARGWLTADLEP-----VP-----DFDPLAVDYERVGEYKRSR      |
| ADE05003.2  | LLIDLTLVARGWLTADLEP-----VP-----DFDPLAVDYERVGEYKRSR      |
| QCC48543.1  | LLVSLDRLVEAGYLDAADLEP-----VP-----DFSEHEVDYDRVREYKTDR    |
| ADQ67101.1  | LLVLDLQLREDGYLTDDDDLEP-----VP-----AFSDHEIEYDRVAEYKREQ   |
| QIQ76396.1  | LLVLDLQLREDGYLTDDDDLEP-----VP-----AFSEHEIEYDRVAEYKREQ   |
| QIB74651.1  | LLVLDLQLREDGYLTDDDDLEP-----VP-----AFSEHEIEYDRVAEYKREQ   |
| AIF04697.1  | RFRDPAMHY-----RLDYE-----                                |
| AIF05955.1  | RFRDPAMHY-----RLDYE-----                                |
| QEE14682.1  | LLISPDGLIQMELITLEEVDQ-----CLKEIKIHDEPSKNLKVNYQNVIDLKEKI |
| ADL19304.1  | IMVSPQLLANEGLLADELAS-----LP-----RGEPNRVYGLAYEHRMRL      |
| AMD30778.1  | LMVSPQLLAEGLLTKEEVAS-----IP-----QGPRGRVDYPLAYQHRRL      |
| AKT33963.1  | PLISLDKATRDGILTTRAPRC-----QPTDKADYEAAWQIKRRL            |
| ABL88479.1  | ALISLEKMAQDGLLVRSPKPC-----PSVERTSFAESWELKRRY            |
| ACB39188.1  | ALVLEKMAQLGLAKRAPPSC-----PPAERARFAEAWELKRRY             |
| AEA11843.1  | AYISLELLAEQGVLRSSASAE-----FGAGRADYEAARAYKVKI            |
| ABO08194.1  | RLVSLDLMKRDGLIDQVPQC-----PPTPRADYQAWEVKTKA              |
| ABP49821.1  | KLISLDLMKREGLIDQVPDC-----PPAERVDYAAAWEVKKKA             |
| AFA40300.1  | KLISLDLMKREGLIDQVPDC-----PTAERADYAAAWEVKKKA             |
| AAL63326.1  | VLISLELMKRDGLIDSVPQC-----PPAERADYIKAWEVKRKA             |
| NP_559144.1 | VLISLELMKRDGLIDSVPQC-----PPAERADYIKAWEVKRKA             |
| AET33957.1  | VLISLDLMKKDGLVDQAPQC-----PATERADYVKAWEVKRAV             |
| ABD40312.1  | LLISPEEMVNDGYLDPSDLQE-----GL-----EGPRDEVDYKAVIAYKERL    |
| QXO95450.1  | LLISPEMLVKDGYLDESLEP-----LP-----DFSSDLVDFFPAVIAYKNRL    |
| QVV87979.1  | LLISPEMLVKDGYLDESLEP-----LP-----DFSSDLVDFAAVITYKNRL     |
| CCJ37196.1  | WLISPEQMVIDGLLGPEDIGD-----PP-----GFPEDRVDYRAVMDYKNNL    |
| SAI88308.1  | WLISPEQMVIDGLLAPEDIRD-----PP-----GFPEDRVDYRAVMDYKNSL    |
| CVK34217.1  | WLISPEQMVIDGLLAPEDIRD-----PP-----GFPEDRVDYRAVMDYKNSL    |
| BBL68280.1  | WLISPEQMVDAGLLAPEDIA-----PP-----GFPEDRVDYRAVLDYKNGL     |
| ABN57193.1  | WLISPEQMVDAGLLAPEDIA-----PP-----DFPADRVYRAVLDYKNGL      |
| SAI88240.1  | LLISPDRLVRDGYLRRADLEP-----VP-----GFPEGRVAYEAATWYKDRL    |
| CVK34142.1  | LLISPDRLVRDGYLRRADLEP-----VP-----GFPEGRVAYEAATWYKDRL    |
| CCJ37132.1  | LLISPDRLVRDGYLRRADLEP-----VP-----GFPEGRVAYEAATWYKDRL    |
| BBL68006.1  | LLISPEMLIREGYLRKSELEP-----AP-----GFPPDGRAAYEAAVWYHERL   |
| ABN56987.1  | LLISPEMLVREGYLRKSELEP-----AP-----GFPEERAAYEAAAWYRERL    |

|            |                    |
|------------|--------------------|
| AUV80673.1 | LRRAHGDFEER-----A  |
| QCC51341.1 | LTEAFETFKAD-----A  |
| QSG15659.1 | LEDAFETFKTD-----A  |
| QSG11910.1 | LEEAFFETFQEA-----A |
| QSG08987.1 | LEEAFFETFQEA-----A |
| QSG05483.1 | LEEAFFETFQEQ-----A |
| QGN07616.1 | LRDAFAGFEAD-----A  |
| QSG11921.1 | LRDAFEGFSDV-----A  |
| QSG08998.1 | LRDAFEGFSDV-----A  |
| QSG05496.1 | LRDAFEGFSDV-----A  |
| CCQ33055.1 | LRNAFAGFEER-----A  |
| QSG02731.1 | LRTAFDRFDDD-----R  |
| AUX09035.1 | LREAHNRNYRDR-----R |
| QFU81686.1 | LRVAFETFERE-----Q  |
| AWB27107.1 | LEAAFFEGFRDR-----A |
| QLC34969.1 | LRTAFERFEQS-----A  |
| ACV11232.1 | LSAAFDGFEAS-----A  |
| QPV62520.1 | LRTAHETFAAK-----A  |
| QLH84085.1 | LRAAHDFTFAE-----A  |
| QLH79093.1 | LRTAYERFAAA-----A  |
| QAU11732.1 | LRTAFDRFEER-----A  |
| QAY20111.1 | LRTAFEQFEER-----A  |
| QWC20591.1 | LRTAFERFEER-----A  |
| QUO46499.1 | LRTAFERFEER-----A  |
| QKG93724.1 | LRTAFDRFEER-----A  |
| QKY17977.1 | LRTAFERFDEE-----A  |
| ACM57093.1 | LRTAFERFDEA-----E  |
| AZQ14643.1 | LRTAFERFDEA-----G  |
| ATW89261.1 | LRTAHEQFRET-----A  |
| ABQ75827.1 | LRTAAESFFDEFG----- |
| QZX99028.1 | LRVAFERFREV-----A  |
| QZP38174.1 | LRTAFDRFREV-----A  |
| QZY03180.1 | LRTAFERFREV-----A  |
| AUG48211.1 | LRTAYENFDES-----A  |
| AEM58055.1 | LRTAYERFDES-----A  |
| AHB66799.1 | LRTAYERFDES-----A  |
| AJF25101.1 | LRTAYERFDES-----A  |
| AAV46825.1 | LRDAYAAFEES-----A  |
| QCP91534.1 | LRDAYAAFEES-----A  |

QUJ72368.1 LRDAYAAFEES-----A  
UBZ54001.1 LQIAAERFRESIGGIAIHPHPDPDTTVNSGVGDGTVPEVTVTLGESVNLSDQTPADSQ  
CCC40696.1 LRIAARKRFQESVGGINIHA---D-TD-TTASSGVNDDIAVDVTVTLGDSVDPSQNI-STHNQ  
CAJ52690.1 LRIAARKRLQESVGGINIHA---D-TD-TTASSGVNDDIAVDVTVTLGDSVDPSQNI-STHNQ  
QCJ48434.1 LETAFERFESE-----G  
AHZ21176.1 LRTAFDRFEED-----A  
AFK19479.1 LRTAFDRFEED-----A  
AFK19479.2 LRTAFDRFEED-----A  
QCQ75940.1 LRTAFDRFEED-----A  
AKU07735.1 LRTAFDRFEAE-----A  
QOS11852.1 LRTAFDRFEAE-----A  
QIB78738.1 LRAAFDRFEAE-----A  
ADE05003.1 LRAAFDRFEAE-----A  
ADE05003.2 LRAAFDRFEAE-----A  
QCC48543.1 LRTAAERFRSADGDDGSA-----RASGSA  
ADQ67101.1 LRTAHERFQSE-----A  
QIQ76396.1 LRTAHERFQSE-----A  
QIB74651.1 LRTAHERFQSE-----A  
AIF04697.1 -----  
AIF05955.1 -----  
QEE14682.1 LKIAFKTFLQKQF-----QQ  
ADL19304.1 LRLAFSRFKPS-----  
AMD30778.1 LELALSFRKPT-----  
AKT33963.1 LEEAFEKRRGW-----  
ABL88479.1 VEEAFETKLGW-----  
ACB39188.1 LEEAFEGRLGW-----  
AEA11843.1 I-----AEAERP-----  
ABO08194.1 LEKAYKRHRL-----  
ABP49821.1 LEKALRRGKKL-----  
AFA40300.1 LEKALRRGKKL-----  
AAL63326.1 LEKALKRAGRL-----  
NP\_559144.1 LEKALKRAGRL-----  
AET33957.1 LEKALKKARAL-----  
ABD40312.1 FDMAYNRFAYF-----  
QXO95450.1 FDMAYNRFVFF-----  
QVV87979.1 FDMAYNRFVFF-----  
CCJ37196.1 FDRAFERFRER-----  
SAI88308.1 FDRAFERFRER-----  
CVK34217.1 FDRAFERFRER-----  
BBL68280.1 YDKAFERFKQQ-----  
ABN57193.1 FDTAFERFKGR-----  
SAI88240.1 FSIAYQRFLLHS-----  
CVK34142.1 FSIAYQRFLLHS-----  
CCJ37132.1 FSIAYQRFLLHS-----  
BBL68006.1 FAAAYERFRYS-----  
ABN56987.1 FAAAYERFRHS-----

AUV80673.1 TAVERKAFTTFRE-SNDWLDDYALFRALKRDHDSAAWTEWPRGERDRDPDALGAARGRLS  
QCC51341.1 SDDEQSNFETFFVEESGEWLDEYALYRALRDHYDGVSWLDWPPEAKMRDPDALAEYREELA  
QSG15659.1 SDDDRADFEAFTDDAGDWLDEYALYRALRTHFDGVSWLDWPPEAKMRDPDLAEYREELS  
QSG11910.1 SDDERAAFEQFKDDAGEWLEEYALYRALRTHFDGVSWLDWPPEAKMRDPDALEQYREQLA  
QSG08987.1 SDDERAAFEQFKDDAGEWLEEYALYRALRTHFDGVSWLDWPPEAKMRDPDALERYREELA  
QSG05483.1 GDDERAAFEQFKDDAGEWLDEYALYRALRTHFGVSWLDWPPEAKTRDPDALEQYREQLA  
QGN07616.1 EPAKLTDFETYCGEAGDWLEEYALFRALNDHFDG-EWVEWPAEAKHRDPDALDRYREELA  
QSG11921.1 DPDDLTAFFESFCEENAEWLDDYALFRALDDHFDADTWLDWPDGAKFRDPDALERYREQLA  
QSG08998.1 DPDDLTAFFESFCEENAEWLDDYALFRALDDHFDADTWLDWPDGAKFRDPDALERYREQLA  
QSG05496.1 DADDWAAFFESFCEENAEWLDDYALFRALDDHFDADTWLDWPDGAKFRDPDALERYREQLA  
CCQ33055.1 DEDARAFFETFRTEAENWLDYALFRALDAHFEADTWMDWPDGAKFRDPETLDRYREELA  
QSG02731.1 PDELWGAFERFRE-ETDWLHNYALFRALKREFDGESWTNWPEPVALREPDALDEYREELA  
AUX09035.1 PTDLVESIEAFES-RAEWLDDYALYRALKRFRDERSWTDWPEEFRLREPDALERAREELA  
QFU81686.1 PPDLVDGLGQFRA-ESTWLEEYAHFAALKADFDRQAWLDWPEPIRLRDPDALERSCEQRA  
AWB27107.1 TDEERATFEAFREREAGWLADYSLFVTLRERFDGQPWADWPAEFASRDPAIETIRTERA  
QLC34969.1 DAGESDAFAAFRERERDYLADYALYRALKRHVHGGESWTEWPRELREDRDPALAAAREEHA  
ACV11232.1 EADDRAAFEAFREREATWLRDYLTLFTALKAAAYDGVWPPEWPAADLAGRDPDALEAARETHA  
QPV62520.1 SGEERAASFESFRERESAWLEDYALYAALKGAHGDAAWTDWPAADLVRREADALSAARETHA  
QLH84085.1 SEERAAFAAFREREAAWLEDYALYAALKDAHGDAAWTDWPAADLARRDADALAAARETHA  
QLH79093.1 SEDERADFAAFRERESAWLADYALYAALSAHGGAAWTDWPAADLARRDADALAAARETHA  
QAU11732.1 TEEDRAALDAFVDE-PWLADYALFRAVSDARPEDVWTEWPAPLRTDPPEALSGAREDEHA  
QAY20111.1 TKEDRAALGAFRERE-PWLADYALFRALSDARPEDVWTEWPAPLRTDPDALAEAREEHA  
QWC20591.1 TDADRAAVDEFRERE-PWLPDYALFRALSDARPEDVWTEWPEPLRTDPPEALASAREEHA  
QUO46499.1 SEDDRAAVAEFRERE-PWLADYALFRALSDARPEDVWTDWPAADLRTDPPEALADAREEHA  
QKG93724.1 TEADRAALDEFRERE-PWLADYALFRALSDARPEDVWTDWPAADLRTDPPEALAEAREDEHA  
QKY17977.1 GEEAEADLDAFRERE-PWLADYALFRALSEARDEDTWVEWPEPLRTDPPEALAEARERHA  
ACM57093.1 AGKAHSEFDAFRERE-PWLDDYALFRAMSGERDDDTWVEWPDPLRTREPEALDEARERHA  
AZQ14643.1 AGDAAPDFDAFCERE-SWLDDYALFRALSAERDEATWVDWPDPLRTREPDALADARERHA  
ATW89261.1 TDDDYAALDEFDRD-EESWVDDYALFRALKQKHDGVAVVDWPEPIRTDPDALSEAREELS  
ABQ75827.1 ---PTESFGRFCESQSAWLDDYALFMSLHDALE-GAWTEWPEPIRTHESSAAVEHYRNELE

QZX99028.1 SDDDRASFAEFRDREADWLADYALFRALKAEFDETLWTEWPEPARTRDPDALAAYREDLA  
QZP38174.1 SDDERETFAAFREREADWLADYALFRALKREFDGTWTEWPEPVTRDPDALADYRDELA  
QZY03180.1 SDGEREAFAAFREREGDWLADYALFRALKREFDGTWTEWPEPVTRDPDALADYRDELA  
AUG48211.1 AEADRNAFAEFCEREAGWVDDYALFTALKTEFDDAGWMDWPDDIRTREPAAMERYQEELA  
AEM58055.1 SDADQQSFSAEFCEREAGWLDDYALFTALKAEFDDAGWMDWPDDIRTREPAEVERYRDELA  
AHB66799.1 SDADQQSFSAEFCEREAGWLDDYALFTALKAEFDDAGWMDWPDDIRTREPAEVERYRDELA  
AJF25101.1 SDADQQSFSAEFCEREAGWLDDYALFTALKAEFDDAGWMDWPDDIRTREPAEVERYRDELA  
AAV46825.1 SDADQQSFTEKFCEREAGWLDDYALFTALKAEFDDAGWMDWPDDIRTREPAAMERYQDDLA  
QCP91534.1 SDADQQSFTEKFCEREAGWLDDYALFTALKAEFDDAGWMDWPDDIRTREPAAMERYQDDLA  
UJ72368.1 SDADQQSFTEKFCEREAGWLDDYALFTALKAEFDDAGWMDWSDDIRTREPAAMERYQDDLA  
UBZ54001.1 IEKDAREFKSFYQRENHWLTDYALFMAALRTSYD-GAWTDWPEPIRNRDPDALRDQYESLE  
CCC40696.1 TSIDATAFKPFYHRESHWLT DYALFMAALRTSYD-GAWTDWPESIRHRDPDALSDQYESLD  
CAJ52690.1 TSIDATAFKSFYRRESHWLT DYALFMAALRTSYD-GAWTDWPESIQHRDPDALSDQYESLD  
QCJ48434.1 SDDEREAFEAFRERESSWLDDYTLFISLKEAHDHVAWTDWPEGLKTREPDALDAQRDDLE  
AHZ21176.1 SEDDRDAFEAFREREAHWLEDYALFASLKDEFE-GAWIDWPTELKTRDPALARARDEHE  
AFK19479.1 SEDDRDAFEAFREREAHWLEDYALFASLKDEFE-GAWIDWPTELKTRDPALARARDEHE  
AFK19479.2 SEDDRDAFEAFREREAHWLEDYALFASLKDEFE-GAWIDWPTELKTRDPALARARDEHE  
CCQ75940.1 SEDDRDAFEAFREREAHWLEDYALFASLKDEFE-GAWIDWPTELKTRDPALARARDEHE  
AKU07735.1 AEDDRAALDAFREREAGWLEDYALFAALKDEFERAWIDWPTELKTRDPDALADAREEYA  
QOS11852.1 AEDDRAALDAFREREAGWLEDYALFAALKDEFERAWIDWPTELKTRDPDALADAREEYA  
QIB78738.1 TEDARAALDAFREREAGWLEDYALFAALKDEFERAWIDWPTELKTRDPDALADAREEYA  
ADE05003.1 TEDDRAALDAFREREAGWLEDYALFAALKDEFERAWIDWPTELKTRDPDALADAREEYA  
ADE05003.2 TEDDRAALDAFREREAGWLEDYALFAALKDEFERAWIDWPTELKTRDPDALADAREEYA  
QCC48543.1 TEADREAFEAFRERESGWLDDYALFMAALRTSYD-GAWTSWPEPIRARDPDALDAHREELA  
ADQ67101.1 TTEDREAFDAFREHSSWLDDYALFMAALRTSYD-GAWTTWPQEIRTHDEEAINRHREELA  
QIB76396.1 TTEDREAFDAFCERESSWLDDYALFMAALRTSYD-GAWTTWPQEIRTHDEEAINRHREELA  
QIQ74651.1 TTEDREAFDAFCERESSWLDDYALFMAALRTSYD-GAWTTWPQEIRTHDEEAINRHREELA  
AIF04697.1 -----SVEKWIENLHWLEDYALFAVLKYQLDGLPWTQWPAPLRDRDPEAIKEVIDELY  
AIF05955.1 -----SVEKWIENLHWLEDYALFAVLKYQLDGLPWTQWPAPLRDRDPEAIKEVIDELY  
QEE14682.1 NSSKLNDSFVKFCCEEQAYWLDDFVLFYSLKVANNLQSWITWPKNFALRHKNALKVVIAGHS  
ADL19304.1 --G---DYDRFLDRNSWWLEDYALYVSLREHFKGSDWSSWPEGLRRDRGEMQAWREKLL  
AMD30778.1 --G---DYDRFVDSNSWWLSDYALYASLREHFNKSDWGSWPEGLRRDRKELEAWGQKLL  
AKT33963.1 --G---EFEFAARNNSWWLEPYGVYMAALREAY-SAPWTRWPKEL-REGV----DLPEELR  
ABL88479.1 --R---DYEEDIAENSWWLESYGRYMAALRETF-RVPWIQWPEWARRLNT----PLPPKLA  
ACB39188.1 --R---DYEEDIAARNNSWWLEPYGRYMAALREAF-GGFWTAWPAWARAPNA----DLPPRL  
AEA11843.1 --K---DLDEFVG-RNEWLEDYALYSALREYF-GRPWVWPRELRDRDPALRQWREKLL  
ABO08194.1 --K---DFTAFMEEEWELGEYATYMAALREH-G-PHP--PRGNAP-----R  
ABP49821.1 --S---DYKNFVE-STPWLEDYAYYAMAMRDLY-G-PWPKWPRRDP-----G  
AFA04030.1 --S---DYKNFAE-STPWLEDYAYYAMAMRDLY-G-PWPKWPRKEPP-----G  
AAL63326.1 --S---DYRHFKD-VTPWLDDYAYYAMAMRERF-G-PWPVWPKEPP-----P  
NP\_559144.1 --S---DYRHFKD-VTPWLDDYAYYAMAMRERF-G-PWPVWPKEPP-----P  
AET33957.1 --S---DYRNFDV-KTPWLDDYAYYAMAMRERH-G-PWGRWPDEAPP-----R  
ABD40312.1 --GSDPRFIDFCSEQAWWLDDYALFTAIRKYYAPAVWSWDPHPLKERDPQALHEFQEKNN  
QXO95450.1 --GTDPAFLTFCEEQAWWLDDYALFTAIRKHYPDILWSDWPSGLRNHNENELHEFKKLYH  
QVV87979.1 --GTDPAFLTFCEEQAWWLDDYALFSAIKKHYPDILWSDWPSGLRNHNENELHEFKKLYH  
CCJ37196.1 --GPDFRYKEFAAGNVSWLDDYALFVALRERFEGKVWGDWPPDIRDRHQDALHAYGTELA  
SAI88308.1 --GPDFRYKEFAAGNVSWLDDYALFVALRERFEGKVWGDWPPNIDRHRQDALHAYGTELE  
CVK34217.1 --GPDFRYKEFAAGNVSWLDDYALFVALRERFEGKVWGDWPPNIDRHRQDALHAYGTELE  
BBL68280.1 --GCDFRYEDFAAGNTSWLNDYALFVALKGEFPGKAWSDWPTGIRDRREEALRKRGTLELA  
ABN57193.1 --GSDFRYEDFAADNTSWLNDYALFMAALRERFSGKVWGDWPPAGIRDRHDEALRKYGTLELA  
SAI88240.1 --GPERGYEEFCDENAWWLEDHALFVALKDHFHREQEWSRWPEEVRARQSEALDDLQRRLL  
CVK34142.1 --GPERGYEEFCDENAWWLEDHALFVALKDHFHGLEWSRWPEEVRARQSEALDDLQRRLL  
CCJ37132.1 --GPERGYEEFCDENAWWLEDHALFVALKDHFHGLEWSRWPEEVRARQSEALDDLQRRLL  
BBL68006.1 --GPDRRFEAFCDGAGWLDDHALFVALKDHFHREQAWTRWPEIRAREPALKEMRELLD  
ABN56987.1 --GPDRRFETFCDGTGWLLDDHALFVALKGHFRGQAWNRWPEIRARETALKEMRELLD

: \* : . :

AUV80673.1 GEIAFREFCQFCFDQQWSALRSYATQHDSVLGDPVIYVAGDSADVWANRDPVQLDEEGQ  
QCC51341.1 DSIEYRKFLQWVFDQWNLKEYANERGVKFGVDMPIYVDLDSADVWANPEIFKLDAERE  
QSG15659.1 ETIEYRKFLQWLFDEQWSELKAYANERGVLDVDMPIYVDLDSADVWANPEIFKLDEQRE  
QSG11910.1 ETIEYRQFLQWLFDDQWSALKEYANERGVKLVGDVPIYVDLDSADVWANPEIFKLDEQRE  
QSG08987.1 ETIEYRQFLQWLFDDQWSALKEYANERGVKLVGDVPIYVDLDSADVWANPEIFKLDEQRE  
QSG05483.1 ETVEYRQFLQWLFDDQWSALKDYANERGVKLVGDVPIYVDLDSADVWANPEIFKLDEQRE  
QGN07616.1 EEIRFRKFLQWVFETQWQALRSYADDRGVSLVGDMPYVGTNSADVWANPELFLKLEDELE  
QSG11921.1 RDVRFRQFLQWVFDQWAEALREHAHEHGIELVGDMAIYVGTNSADVWANPEIFKLDEERE  
QSG08998.1 RDVRFRQFLQWVFDQWAEALREHAHEHGIELVGDMAIYVGTNSADVWANPEIFKLDEERE  
QSG05496.1 RDVRFRQFLQWVFDQWAEALREHAHEHGIELVGDMAIYVGTNSADVWANPEIFKLDEERE  
CCQ33055.1 EDVRFQFLQWRFERQWADLRAYAHERGIDLVDMPYVGTNSADVWANPEIFKLDDRE  
QSG02731.1 DEIRYRAFLQFVAARQWDRLRTHAEQRGVQIVGDLPIYVAQDSADVWANPELFELEDGT  
AUX09035.1 NEISYRVFLQAVAHQWYRLHEYATDRGIDVGDVPIYVALDSADVWANPELFELEDGT  
QFU81686.1 SDIRYHAFVQYLAEEQWTELDRHAAAHGVEIVGDLPIYVALDSADVWANPELFELEDGT  
AWB27107.1 DRIAYHAFVQWIFDEQWQRLRAEAERGVLDLIGDLPIYVAWDSADVWAHREAFDLRADGH  
QLC34969.1 DEVRYHAFVQWRFDEQWRALREAAASERDIRLLGDVPMYALDSADVWANPEAFELDDGG  
ACV11232.1 EAVDYHAFVQWVFDQWRELRAAAERGIELVGDLPYIYVALDSADVWANPEAFELDDGG  
QPV62520.1 EAVDYHAFVQWVFDQWRELRAAAERGIELVGDLPYIYVALDSADVWANPEAFELDDGG  
QLH84085.1 EAVDYHAFVQWVFDQWRELRAAAERGVLDLIGDLPIYVALDSADVWADQAFQLDDGG  
QLH79093.1 EAVEYHAFVQWVFDQWRELRAAAERGVLDLIGDLPIYVALDSADVWADQAFQLDDGG  
QAU11732.1 REVRFREFVQWTFDRQWRDLRAVATEEGSVIGDVPYIYVALDSADVWANPEAFQLDEGNR

QAY20111.1 AEVRFRAFVQWTFDRQWHELRAVAADDEGVSIYVGLDSDADVWASPEAFRLDEGNNR  
QWC20591.1 REVRFRFVQWTFDRQWRDLRAVAEEGVSIYVGLDSDADVWASPEAFQLDEGNNR  
QUO46499.1 REVRFRFVQWTFDRQWRDLRAVAEEGVSIYVGLDSDADVWASPEAFRLDEGNNR  
QKG93724.1 REIRFRFVQWTFDRQWRDLRAVAEEGVSIYVGLDSDADVWASPEAFRLDEGNNR  
QKY17977.1 TEVRFRFVQWTFDRQWRDMRAVAEEGVSIYVGLDSDADVWASPEAFRLDESNNR  
ACM57093.1 TEVRFGFELQWMFDRQWRDLRAVAADDEGVSIYVGLDSDADVWASPEAFRLDEGNNR  
AZQ14643.1 GEIRFRFVQWTFDRQWRDLRAVAADDEGVSIYVGLDSDADVWASPEAFRLDEGNNR  
ATW89261.1 EEIEYQTLIQYWFDKQWQAFKADAEKGIKLVGDVPIYVGLDSDADVWSSPEAFQLDDQNNR  
ABQ75827.1 SDIAYRKFFVQFVDRQWRDLRAVAADDEGVSIYVGLDSDADVWADPEAFELNDHQ  
QZX99028.1 DEIEFRAFQWTFDRQWRDLRAVAADDEGVSIYVGLDSDADVWAAPEAFDLTDDGGR  
QZP38174.1 DEVDFRAFQWTFDRQWRDLRAVAADDEGVSIYVGLDSDADVWAAPEAFDLTDDGGR  
QZY03180.1 DAVDFRAFQWTFDRQWRDLRAVAADDEGVSIYVGLDSDADVWAAPEAFDLTDDGGR  
AUG48211.1 DDIYRHKFFVQWCFDSQWALAEYAAERDGLVGLDPIYVGLDSDADVWAYPEVFRLLDDHH  
AEM58055.1 DDIYRHKFFVQWCFDSQWALAEYAAERDGLVGLDPIYVGLDSDADVWAYPEVFRLLDDHH  
AHB66799.1 DDIYRHKFFVQWCFDSQWALAEYAAERDGLVGLDPIYVGLDSDADVWAYPEVFRLLDDHH  
AJF25101.1 DDIYRHKFFVQWCFDSQWALAEYAAERDGLVGLDPIYVGLDSDADVWAYPEVFRLLDDHH  
AAV46825.1 DDIYRHKFFVQWCFDSQWALAEYAAERDGLVGLDPIYVGLDSDADVWAYPEVFRLLDDHH  
QCP91534.1 DDIYRHKFFVQWCFDSQWALAEYAAERDGLVGLDPIYVGLDSDADVWAYPEVFRLLDDHH  
QUJ72368.1 DDIYRHKFFVQWCFDSQWALAEYAAERDGLVGLDPIYVGLDSDADVWAYPEVFRLLDDHH  
UBZ54001.1 SDVLYHLIVQFIFDQWQSLQTAANRGVTLVGLDPIYVGLDSDADVWATPEIFQLTDTNE  
CCC40696.1 SEVIYHLIIQFIFDQWQSLQTAANRGVTLVGLDPIYVGLDSDADVWATPDVFLTKDNE  
CAJ52690.1 SEVIYHLIIQFIFDQWQSLQTAANRGVTLVGLDPIYVGLDSDADVWATPDVFLTKDNE  
QCJ46434.1 AERRYHFKFVQWCFDSQWALAEYAAERDGLVGLDPIYVGLDSDADVWASPEAFDLTDDGGR  
AHZ21176.1 DEIRYREFVQCFDEQWRDLAAAYADEKSVTLVGLDPIYVGLDSDADVWAAPEAFDLTDDGGR  
AFK19479.1 DEIRYREFVQCFDEQWRDLAAAYADEKSVTLVGLDPIYVGLDSDADVWAAPEAFDLTDDGGR  
AFK19479.2 DEIRYREFVQCFDEQWRDLAAAYADEKSVTLVGLDPIYVGLDSDADVWAAPEAFDLTDDGGR  
CCQ75940.1 DEIRYREFVQCFDEQWRDLAAAYADEKSVTLVGLDPIYVGLDSDADVWAAPEAFDLTDDGGR  
AKU07735.1 DEIRYREFVQCFDEQWRDLAAAYADEKSVTLVGLDPIYVGLDSDADVWAAPEAFDLTDDGGR  
QOS11852.1 DEIRYREFVQCFDEQWRDLAAAYADEKSVTLVGLDPIYVGLDSDADVWAAPEAFDLTDDGGR  
QIB78738.1 DEIRYREFVQCFDEQWRDLAAAYADEKSVTLVGLDPIYVGLDSDADVWAAPEAFDLTDDGGR  
ADE05003.1 DEIRYREFVQCFDEQWRDLAAAYADEKSVTLVGLDPIYVGLDSDADVWAAPEAFDLTDDGGR  
ADE05003.2 DEIRYREFVQCFDEQWRDLAAAYADEKSVTLVGLDPIYVGLDSDADVWAAPEAFDLTDDGGR  
QCC48543.1 PEVHYREFVQFVDRQWRDLREYAHERGVDLVGLDPIYVGLDSDADVWASPEAFDLTDDGGR  
ADQ67101.1 DEISYREFVQFVDRQWRDLREYAHERGVDLVGLDPIYVGLDSDADVWASPEAFDLTDDGGR  
QIQ76396.1 DEVSYRFAQFVFDQWRDLREYAHERGVDLVGLDPIYVGLDSDADVWASPEAFDLTDDGGR  
QIB74651.1 DEVSYRFAQFVFDQWRDLREYAHERGVDLVGLDPIYVGLDSDADVWASPEAFDLTDDGGR  
AIF04697.1 GSMGKWMEEQFIIKIDWSQLRNTAECEGVSFLGDLFFVFAHDSADVWASPEAFDLTDDGGR  
AIF05955.1 GSMGKWMEEQFIIKIDWSQLRNTAECEGVSFLGDLFFVFAHDSADVWASPEAFDLTDDGGR  
QEE14682.1 RELKLYKFIQWIFSIQWNTLRFDAHKNNVETIGDMPIFVFAHDSADVWASPEAFDLTDDGGR  
ADL19304.1 ERIELEHFIQWIFSIQWNTLRFDAHKNNVETIGDMPIFVFAHDSADVWASPEAFDLTDDGGR  
AMD30778.1 SRVELELFIQWIFSIQWNTLRFDAHKNNVETIGDMPIFVFAHDSADVWASPEAFDLTDDGGR  
AKT33963.1 RRAQFYQYVQVFWQWDLRLRAHARRLGIIRIGDPIYVGLDSDADVWASPEAFDLTDDGGR  
ABL88479.1 KLAEFYQYVQVFWQWDLRLRAHARRLGIIRIGDPIYVGLDSDADVWASPEAFDLTDDGGR  
ACB39188.1 RRADFYRYVQVFWQWDLRLRAHARRLGIIRIGDPIYVGLDSDADVWASPEAFDLTDDGGR  
AEA11843.1 RRIELELFIQWIFSIQWNTLRFDAHKNNVETIGDMPIFVFAHDSADVWASPEAFDLTDDGGR  
ABO08194.1 DRVEFYQYVQVFWQWDLRLRAHARRLGIIRIGDPIYVGLDSDADVWASPEAFDLTDDGGR  
ABP49821.1 ELVELYKFAQFVFWQWDLRLRAHARRLGIIRIGDPIYVGLDSDADVWASPEAFDLTDDGGR  
AFA40300.1 ELVELYKFAQFVFWQWDLRLRAHARRLGIIRIGDPIYVGLDSDADVWASPEAFDLTDDGGR  
AAL63326.1 ASLELYKFAQFVFWQWDLRLRAHARRLGIIRIGDPIYVGLDSDADVWASPEAFDLTDDGGR  
NP 559144.1 ASLELYKFAQFVFWQWDLRLRAHARRLGIIRIGDPIYVGLDSDADVWASPEAFDLTDDGGR  
AET33957.1 RLVELYKFAQFVFWQWDLRLRAHARRLGIIRIGDPIYVGLDSDADVWASPEAFDLTDDGGR  
ABD40312.1 SVIEREQFLQFIFFHQWALRRKSHLGIWLIIGDPIYVGLDSDADVWASPEAFDLTDDGGR  
QXO95450.1 SVIEREQFLQFIFFHQWALRRKSHLGIWLIIGDPIYVGLDSDADVWASPEAFDLTDDGGR  
QVV87979.1 SVIEREQFLQFIFFHQWALRRKSHLGIWLIIGDPIYVGLDSDADVWASPEAFDLTDDGGR  
CCJ37196.1 DRILREKFLQYVFDQWKTLLKNCRSRHLQVIGDLPVYLYTSDVLDWANPDLFKLDEQKK  
SAI88308.1 DRILREKFLQYVFDQWKTLLKNCRSRHLQVIGDLPVYLYTSDVLDWANPDLFKLDEQKK  
CVK34217.1 DRILREKFLQYVFDQWKTLLKNCRSRHLQVIGDLPVYLYTSDVLDWANPDLFKLDEQKK  
BBL68280.1 DRILREKFLQYVFDQWKTLLKNCRSRHLQVIGDLPVYLYTSDVLDWANPDLFKLDEQKK  
ABN57193.1 DRIFREKFLQYVFDQWKTLLKNCRSRHLQVIGDLPVYLYTSDVLDWANPDLFKLDEQKK  
SAI88240.1 DGVRKEKFLQYLAARQWSALHRRCTDLGIQVIGDPIYVGLDSDADVWASPEAFDLTDDGGR  
CVK34142.1 DVVRKEKFLQYLAARQWSALHRRCTDLGIQVIGDPIYVGLDSDADVWASPEAFDLTDDGGR  
CCJ37132.1 DEVRKEKFLQYLAARQWSALHRRCTDLGIQVIGDPIYVGLDSDADVWASPEAFDLTDDGGR  
BBL68006.1 DQIRKEKFLQYLAARQWSALHRRCTDLGIQVIGDPIYVGLDSDADVWASPEAFDLTDDGGR  
ABN56987.1 DRIRKEKFLQYLAARQWSALHRRCTDLGIQVIGDPIYVGLDSDADVWASPEAFDLTDDGGR

\* : \* : : . . \* : : \* \* \* \*

AUV80673.1 PTAAGVVPDAPDEVFSQARWGMPFLDWEALERTGFAWWSRRLERLFAQCIDIVRIDHFRGL  
QCC51341.1 PKYVSGVPPDE-FSDDGQMWGTPVYDWDALDERDYGWWVSRFERLLQVRDIFRIDHFKGF  
QSG15659.1 PKYVSGVPPDE-FSDDGQMWGTPVYDWAALAERDYGWWVSRFERLLQVRDIFRIDHFKGF  
QSG11910.1 PEYVSGVPPDE-FSDDGQMWGTPVYDWAALAERDYGWWVSRFERLLQVRDIFRIDHFKAF  
QSG08987.1 PEYVSGVPPDE-FSDDGQMWGTPVYDWAALAERDYGWWVSRFERLLQVRDIFRIDHFKAF  
QSG05483.1 PEYVSGVPPDE-FSDDGQMWGTPVYDWTALAERDYGWWVSRFERLLQVRDIFRIDHFKAF  
QGN07616.1 PAYVAGVPPDE-FSETGQLWGMPVYDWAALAEDEYEWLQRFEGLLDRFDVFRIDHFKGF  
QSG11921.1 PIYVSGVPPDD-FSDTGQLWGTPVYDWTADREYDWWIQRFAGLLDRFDVFRIDHFKGF  
QSG08998.1 PIYVSGVPPDD-FSDTGQLWGTPVYDWTADREYDWWIQRFAGLLDRFDVFRIDHFKGF  
QSG05496.1 PIYVSGVPPDD-FSDTGQLWGTPVYDWTADREYDWWIQRFAGLLDRFDVFRIDHFKGF  
CCQ33055.1 PIYVAGVPPDD-FSDTGQLWGMPVYDWTADREYDWWIQRFAGLLDRFDVFRIDHFKGF  
QSG02731.1 PKDVSGVPADE--VNPAQKWGPPVYDWAEEHSGYEWIARLERQLELADIVRLDHFGRGF

AUX09035.1 PAVVAGVPPGD--DDDQKWGNPVYDWDALAATGYEWWVDRMAWTLDLVDLVRDLHFRGF  
QFU81686.1 PAVVSGVPPGGGETDQKWGNPVYDWDRLAETSYEWWVDRFERLFELVDIARLDHFLAF  
AWB27107.1 PAAVAGVPPNP--GDDGQRWGNPVYDWDALA-PEYDWWVARLDRLALVDRVRIDHFKAF  
QLC34969.1 PEAVAGVPPSA--GDDGQRWGNPVYDWDALAADDYGWWVRRLDRLFDLVDVARLDHFKAF  
ACV11232.1 PTAVAGVPPNP--GDDGQRWGNPVYDWDWETLRAEDYGWWDRDLRLSLVDIARIDHFKAF  
QPV62520.1 PTAVAGVPPNP--GDDGQRWGNPVYDWDGRLETDYEWWRDLRLSLDLVDLARIDHFKAF  
QLH84085.1 PTAVAGVPPNP--GDDGQRWGNPVYDWDRLRETGYEWWRRRLSRLDLVDLARIDHFKAF  
QLH79093.1 PTAVAGVPPNP--GDDGQRWGNPVYDWDRLRETGYEWWRRRLSRLDLVDLARIDHFKAF  
QAU11732.1 PTVAGVPPNP--GDDGQRWGNPVYDWERLSESGYDWWLDRFRLFELADVARLDHFLGF  
QAY20111.1 PTAVAGVPPNA--GDSGQRWGNPLYDWERLAESGYDWWLDRFRLFDLADVARLDHFLGF  
QWC20591.1 PTAVAGVPPNA--GDSGQRWGNPLYDWERLAESGYDWWLDRFRLFELADVARLDHFLGF  
QUO46499.1 PTAVAGVPPNA--GDSGQRWGNPLYDWEHLADTGYDWWLDRFRLFELADVARLDHFLGF  
KQG93724.1 PTAVAGVPPNA--GDDGQRWGNPLYDWEHLAESGYDWWLDRFRLFELADVARLDHFLGF  
QKY17977.1 PTAVAGVPPNP--GDDGQRWGNPVYDWERLAERDYDWWIARFRLFDLADVARLDHFLGF  
ACM57093.1 PAVVAGVPPNP--GDDGQRWGNPVYDWDRLAERDYDWWIARFRLFELADVARLDHFLGF  
AZQ14643.1 PTAVAGVPPNP--GDDGQRWGNPVYDWDRLAERDYDWWIDRFRRLFDLADVARLDHFLGF  
ATW89261.1 PTAVAGVPPNA--GDSGQRWGNPLYDWDWETLADNDYDWWGRRLGRLEQVDITRLDHFQGF  
ABQ75827.1 PSAVAGVPPTE--SDAGQRWGNPLYDWEHLRETNYEWWISRLELRFELVDITRIDHFKGF  
QZK99028.1 QZVAGVPPNA--GDSGQRWGNPVYDWDHLAETGYEWWDLRLRLFDLVDYARLDHFKGF  
QZP38174.1 PAAVAGVPPNM--GDSGQRWGNPVYDWDRLAETGYEWWDLRLRLFDLVDYARLDHFKGF  
QZY03180.1 PAAVAGVPPNM--GDSGQRWGNPVYDWNRLAETGYEWWDLRLRLFDLVDYARLDHFKGF  
AUG48211.1 PAEVAGVPPNP--GDDGQRWGNPVYDWDWETLRANDYGWWVDRFERLFDLVDIARIDHFKGF  
AEM8055.1 PAEVAGVPPNP--GDDGQRWGNPVYDWDALRANDYGWWVDRFERLFDLVDIARIDHFKGF  
AHB66799.1 PAEVAGVPPNP--GDDGQRWGNPVYDWDALRANDYGWWVDRFERLFDLVDIARIDHFKGF  
AJF25101.1 PAEVAGVPPNP--GDDGQRWGNPVYDWDALRANDYGWWVDRFERLFDLVDIARIDHFKGF  
AAV46825.1 PAEVAGVPPNP--GDDGQRWGNPVYDWDALRANDYGWWVDRFERLFDLVDIARIDHFKGF  
QCP91534.1 PAEVAGVPPNP--GDDGQRWGNPVYDWDALRANDYGWWVDRFERLFDLVDIARIDHFKGF  
QUJ72368.1 PAEVAGVPPNP--GDDGQRWGNPVYDWDALRANDYGWWVDRFERLFDLVDIARIDHFKGF  
UBZ54001.1 PAVVAGVPPTD--GDDGQRWGNPVYDWAYLRNTGYNWWDLRLDLFDLVDVTRIDHFKGF  
CCC40696.1 PAVVAGVPPSD--GDDGQRWGNPVYDWEHLRETEYNWWHLRLDLFLVDITRIDHFKGF  
CAJ52690.1 PAVVAGVPPSD--GDDGQRWGNPVYDWEHLRETEYNWWHLRLDLFLVDITRIDHFKGF  
QCJ48434.1 PAAVAGVPPQF--GDSGQRWGNPLYDWDHLRETGYEWWRRRFSRLFDLVDVARLDHFKAF  
AHZ21176.1 PAVVAGVPPNP--NDSGQRWGNPLYDWDTLQEDDYSWWDLRLRLFDLVDVTRIDHFKGF  
AFK19479.1 PAVVAGVPPNP--NDSGQRWGNPLYDWDTLQEDDYSWWDLRLRLFDLVDVTRIDHFKGF  
AFK19479.2 PAVVAGVPPNP--NDSGQRWGNPLYDWDTLQEDDYSWWDLRLRLFDLVDVTRIDHFKGF  
QCQ75940.1 PAVVAGVPPNP--NDSGQRWGNPLYDWDTLQEDDYSWWDLRLRLFDLVDVTRIDHFKGF  
AKU07735.1 PAVVAGVPPNP--NDSGQRWGNPLYDWDWETLREDGYGWWDLRLRLFDLVDVTRIDHFKGF  
QOS11852.1 PAVVAGVPPNP--NDSGQRWGNPLYDWDWETLREDGYGWWDLRLRLFDLVDVTRIDHFKGF  
QIB78738.1 PAVVAGVPPNP--DDAGQRWGNPLYDWDWETLREDGYGWWDLRLRLFDLVDVTRIDHFKGF  
ADE05003.1 PAVVAGVPPNP--DDAGQRWGNPLYDWDWETLREDGYGWWDLRLRLFDLVDVTRIDHFKGF  
ADE05003.2 PAVVAGVPPNP--DDAGQRWGNPLYDWDWETLREDGYGWWDLRLRLFDLVDVTRIDHFKGF  
QCC48543.1 PAAVAGVPPNP--QDDGQRWGNPVYDWDWETLREADYDWWLARLDRLFDLVDVTRIDHFKGF  
ADQ67101.1 PVAVAGVPPNP--NDDGQRWGNPLYDWDYLRENDYDWWMDRLARLFELVDVTRIDHFKGF  
QIQ76396.1 PVAVAGVPPNP--NDDGQRWGNPLYDWDYLRENDYDWWMDRLARLFELVDVTRIDHFKGF  
QIB74651.1 PVAVAGVPPNP--NDDGQRWGNPLYDWDYLRENDYDWWMDRLARLFELVDVTRIDHFKGF  
AIF04697.1 PSVAGVPPDY-FSEDGQKWGTLYNWDADRDEDAWKKARTARMFEMFDLVRIDHFRAL  
AIF05955.1 PSVAGVPPDY-FSEDGQKWGTLYNWDADRDEDAWKKARTARMFEMFDLVRIDHFRAL  
QEE14682.1 LEYAGVPPDY-FSKTGQWGNPLYKWEILQERNFKWFIQRFKRQIELFDWIRVDHFRGF  
ADL19304.1 PTYVSGVPPDY-FSRTGQLWNTPVYDWEELRRERYSWWIRRFASSELFDVARLDHFRGF  
AMD30778.1 PAFVSGVPPDY-FSRTGQLWNTPVYDWEELRRERYSWWVKRMAHASRLFDVARLDHFRGF  
AKT33963.1 PLYVSGVPPDY-FSPTGQLWGTPVYDWDVARRDRYAWWARRLRMLAEFDYIRLDHFRGY  
ABL88479.1 PLYVSGVPPDY-FSPTGQLWGTPVYNWEELERRDRYVWWTRRLTRMLSFYDLRLDHFRGY  
ACB39188.1 PLYVSGVPPDY-FSPTGQLWGTPVYNWAELERRDRYVWWTRRLTRLLSIFDYIRLDHFRGY  
AEA11843.1 PLYVAGVPPDY-FSPTGQLWGNPVYDWDAMRKEGFRWWDLRLRYTSLVFDYVRLDHFRGY  
ABO8194.1 PLYVGGVPPDY-FSPTGQLWGNPVYNWEEEMEREGYRWWIRRLKHALRTFDYVRLDHFRGY  
ABP49821.1 PLYVAGVPPDY-FSPTGQLWGNPVYNWEEALRADGYRWWDLRLRHTLSAFDYVRLDHFRGY  
AFA40300.1 PLYVAGVPPDY-FSPTGQLWGNPVYNWDALRADGYRWWDLRLRHLSVFDYVRLDHFRGY  
AAL63326.1 PLYVAGVPPDY-FSATGQLWGNPVYNWEEALERDGFKWWVNRLKHAVTVFDYVRLDHFRGY  
NP\_559144.1 PLYVAGVPPDY-FSATGQLWGNPVYNWEEALERDGFKWWVNRLKHAVTVFDYVRLDHFRGY  
AET33957.1 PLYVAGVPPDY-FSATGQLWGNPVYNWEEALERDGYRWWVERLRHMLEVFDYVRLDHFRGY  
ABD40312.1 PTFVAGVPPDY-FSATGQVWNNPLYDWDIAKNSGFSWWLLRLKRELSMVDYVRLDHFRGL  
QXO95450.1 PLYVAGVPPDY-FSATGQVWNNPLYDWDIEMKKSFGFSWWVKRMEHELKFVDYVRLDHFRGL  
QVV87979.1 PLYVAGVPPDY-FSATGQVWNNPLYDWDIEMKKTGFSWWVKRMEHELKFVDYVRLDHFRGL  
CCJ37196.1 PAVVAGVPPDA-FSATGQLWGNPVYNWEEAHLEQEFAWWESRIDRTLALVDRVRLDHFRGF  
SAI88308.1 PIVVAGVPPDA-FSATGQLWGNPVYNWEEAHQEQGFAWWESRIDRTLALVDRVRLDHFRGF  
CVK34217.1 PIVVAGVPPDA-FSATGQLWGNPVYNWEEAHQEQGFAWWESRIDRTLALVDRVRLDHFRGF  
BBL68280.1 PTAVSGVPPDA-FSETGQLWGNPVYNWDAHREQGFAWWESRIDRTLALVDRVRLDHFRGF  
ABN57193.1 PTAVAGVPPDM-FSATGQLWGNPVYNWDAHRERGFGWWSRIDRTLALVDRVRLDHFRGF  
SAI88240.1 PTVVAGVPPDM-FSKTGQLWGNPVYDWPALDRGYDWWIRIRRSALYDLFRIDHFRAF  
CVK34142.1 PTVVAGVPPDM-FSKTGQLWGNPVYDWPALDRGYDWWIRIRRSALYDLFRIDHFRAF  
CCJ37132.1 PTVVAGVPPDM-FSETGQLWGNPVYDWPALDRGYDWWIRIRRSALYDLFRIDHFRAF  
BBL68006.1 PTVVAGVPPDI-FSKTGQLWGNPVYDWAALRKRGYNWAGRLARSGLYDLFRIDHFRAF  
ABN56987.1 PTVVAGVPPDI-FSRTGQLWGNPVYDWAALRERGYDWWAGRIARSALYDLFRIDHFRAF  
\*\*\* . \* . : . : \* : \* \* :\*\*\* .

AUV80673.1 ERYWAIAPADESDPNVGEWRDVPSEAFFDALSR-----FGDLSARAFEDIGHPTDAVDDL  
QCC51341.1 ESYWEIPADAETAREGEWVEGPHEDVFFAIRDE-----LGDLP--IVVEDLGEITPKMEEI  
QSG15659.1 ESYWEIPADADTAREGEWVGPHEDIFYAVRDE-----LGELP--IVVEDLGEITDEMURI

QSG11910.1 ESYWEIPADADTAREGEWVVGPHHEEVFFYAVRDQ---LGDLP--IVVEDLGEITEEMDRI  
QSG08987.1 ESYWEIPADADTAREGEWVVGPHHEEVFFYAVRDQ---LGDLP--IVVEDLGEITEEMDRI  
QSG05483.1 ESYWEIPADADTAREGEWVDGPHEEVFFYAVRDQ---LGDLP--IVVEDLGEITEEMDRI  
QGN07616.1 ESFYQIPADHDTAVDGEWVTGPGEALFQTVEAE---LGELP--IIVEDLGHITEETRAL  
QSG11921.1 ESYQVPAEEDTAMNGEWVSGPGRDFFEAVRER---LGDLP--IVVEDLGEVTDATRAL  
QSG08998.1 ESYQVPAEEDTAMNGEWVSGPGRDFFEAVRER---LGDLP--IVVEDLGEVTDATRAL  
QSG05496.1 ESYQVPAEEDTAMNGEWVSGPGRDFFEAVRER---LGDLP--IVVEDLGEVTDATRAL  
CCQ33055.1 ESYQVPAEEDTAMNGEWVSGPGRDFFAAVRDQ---LGELP--IVVEDLGAITDATREL  
QSG02731.1 EYYAIPADGDG-DEGEWRDGPIDFFDRIEDE---LGELP--FIAEDLGFIITEITQL  
AUX09035.1 ESFWAVPVDAPA-REGEWRPGRPDLFFETIERAVETVSEGLP--AIAENLGHVTDDEVETL  
QFU81686.1 DRYWAIPADAPA-HEGEWRDGPGRDLFFETVADG---CDELP--LIAEDLGHLLTDGVERL  
AWB27107.1 ESFWAIPAESDPAAGEWRAGPGAFFERVRAE---HGALP--FIVEDLGFLDDALATL  
QLC34969.1 DAYWAIPANAASADGEWHPGPGAFFERVRED---LGDLP--FVVEDLGFLDDGVLGL  
ACV11232.1 DEYWAIPADADDPAGEWRPGPADFFETIRAE---LGELP--FVVEDLGFLDESMVAL  
QPV62520.1 DEYWAIPADADDPAGEWRPGPADFFETVREH---LGGLP--FVVEDLGFLDESVMGL  
QLH84085.1 DEYWAIPADADDPAGEWRPGPADFFETVDEH---LGGLP--FVVEDLGFLDESMVAL  
QLH79093.1 DEYWAIPADADDPAGEWRPGPADGFFEAMRAD---LGGLP--FVVEDLGFLDESVMVAL  
QAU11732.1 VTYWAIPEDSDDPADGEWREGPGRDLFFETVERE---LGEAP--FIAEDLGFEEPAMDEL  
QAY20111.1 VKYWAIPADSDDPADGEWRDGPGRDLFEAVERE---LGAAP--FIAEDLGFEEDPAMDEL  
QWC20591.1 VKYWAIPADGGDPADGEWREGPGRDLFEAVERE---LGEAP--FIAEDLGFEEPAMDEL  
QUO46499.1 VNYWAIPADSDDPADGEWRDGPGRDLFFETVERE---LGEAP--FIAEDLGFEEPAMDEL  
QKG93724.1 AKYWAIPADSDDPADGEWRDGPGRDLFFETVERE---LGEAP--FIAEDLGFEEPAMEEL  
QKY17977.1 VKYWAIPADRDPAAGEWRAGPGRDLFFETVERE---LGQTP--FIAEDLGFEEPAMDEL  
ACM57093.1 VKYWAIPADADDPAGEWCEGPGRDLFFETVERE---LGQAP--FIAEDLGFEEPAMDEL  
AZQ14643.1 VKYWAIPADADDPAGEWCDGPGRALFFETVERE---LGQAP--FIAEDLGFEEPAMNEL  
ATW89261.1 LEYWAIPTEADSAAGEWRDGPGAFFFEAIEAQ---LGELP--FIAEDLGFPDAELQAL  
ABQ75827.1 ESFWSIPADADSPGAGEWKSGBPDKDFFDTVAAR---LGQLP--FIVEDLGHDQSLHGL  
QZX99028.1 DEFWAIPADSDDPADGEWREGPGDAFFETVREE---FDRLP--FVAEDLGFLDAGSAGL  
QZP38174.1 DEFWAIPADSDDPADGEWREGPGDAFFETVREE---FDRLP--FVAEDLGFLDAGSAGL  
QZY03180.1 DEFWAIPADSDDPADGEWREGPGDAFFETVREE---FDRLP--FVAEDLGFLDAGSAGL  
AUG48211.1 DEFWSIPAEADDPAGEWRDGPGRDLFFETVREH---LGELP--FFVEDLGFLDESIVAL  
AEM58055.1 DEFWSIPAEADDPAGEWRDGPGRDLFFETVREH---LGELP--FFVEDLGFLDESIVAL  
AHB66799.1 DEFWSIPAEADDPAGEWRDGPGRDLFFETVREH---LGELP--FFVEDLGFLDESIVAL  
AJF25101.1 DEFWSIPAEADDPAGEWRDGPGRDLFFETVREH---LGELP--FFVEDLGFLDESIVAL  
AAV46825.1 DEFWSIPAEADDPAGEWRDGPGRDLFFETVREH---LGELP--FFVEDLGFLDESIVAL  
QCP91534.1 DEFWSIPAEADDPAGEWRDGPGRDLFFETVREH---LGELP--FFVEDLGFLDESIVAL  
QUJ72368.1 DEFWSIPAEADDPAGEWRDGPGRDLFFETVREH---LGELP--FFVEDLGFLDESIVAL  
UBZ54001.1 DSYAIPIDADNPAGEWHSVPGYDFFETVREH---IGSLP--FIIEDLGFIIDQALHDL  
CCC40696.1 DAYAIPVDADTPAGEWQSVPGYDFFETIREH---IGSLP--FVVEDLGFIIDQALHDL  
CAJ52690.1 DAYAIPVDSPTPAGEWHSVPGYDFFETIREH---IGSLP--FVVEDLGFIIDQALHDL  
QCJ48434.1 DEYWAIPADADDPAGEWRDAPGYDFFETIERE---FGDLP--FVVEDLGFIIDQALHDL  
AHZ21176.1 DEYWAIDASSDNPEDGEWRDAPGHDFETVERE---LGELP--FIVEDLGFLDASLVDL  
AFK19479.1 DEYWAIDASSDNPEDGEWRDAPGHDFETVERE---LGELP--FIVEDLGFLDASLVDL  
AFK19479.2 DEYWAIDASSDNPEDGEWRDAPGHDFETVERE---LGELP--FIVEDLGFLDASLVDL  
QCQ75940.1 DEYWAIDASSDNPEDGEWRDAPGHDFETVERE---LGELP--FIVEDLGFLDASLVDL  
AKU07735.1 DEFWAIDADSDDPNGEWRDAPGHDFETVERE---LGDLP--FIVEDLGFLDASLVDL  
QOS11852.1 DEFWAIDADSDDPNGEWRDAPGHDFETVERE---LGDLP--FIVEDLGFLDASLVDL  
QIB78738.1 DEFWAIDADSDDPNGEWRDAPGHDFETVERE---LGDLP--FIVEDLGFLDASLVDL  
ADE05003.1 DEFWAIDADSDDPNGEWRDAPGHDFETVERE---LDDLP--FVVEDLGFLDASLVDL  
ADE05003.2 DEFWAIDADSDDPNGEWRDAPGHDFETVERE---LDDLP--FVVEDLGFLDASLVDL  
QCC48543.1 DEFWAIPADSDPADGEWRDAPGADFFETVGER---LGELP--FVVEDLGFLDQSLVDL  
ADQ67101.1 DEYWAIPADAHSPAAGEWRDAPGHDFETVEDQ---FGDLP--FIVEDLGFLDQRMVTL  
QIQ76396.1 DEYWAIPADAHSPAAGEWRDAPGHDFETVEDQ---FGDLP--FIVEDLGFLDQRMVTL  
QIB74651.1 DEYWAIPADAHSPAAGEWRDAPGHDFETVEDQ---FGDLP--FIVEDLGFLDQRMVTL  
AIF04697.1 DSAWEIPAHHPTAKNGQWVQPKAELLEALEV---APAGK--IVAEDLGIIIPSVVEL  
AIF05955.1 DSAWEIPAHHPTAKNGQWVQPKAELLEALEV---APAGK--IVAEDLGIIIPSVVEL  
QEE14682.1 QAFWRISGTAKDAIDGKWIAPGEDLFIEVQKQ---LGILP--IIAEDLGVIITSEVEAL  
ADL19304.1 AAYWEVPAGEKTAVNGRWARGPGEELFRRVMRE---VPRLO--LIAEDLGFIITPDVVQL  
AMD30778.1 AAYWEVPAGEKTAVNGRWARGPGEELFRAIMAA---APRLQ--LIAEDLGFIITPDVVRL  
AKT33963.1 VAYWEVPHGEETAVRGRWAPGPGEELFKAVEDA-----LQR--LIAEDLGFIITPDVVRL  
ABL88479.1 VSYWEVPYGEPTAVRGRWAPGPGEELFKAVEET-----LPR--LIAEDLGFIITPDVVRL  
ACB39188.1 AAYWEVPYGEPTAVRGRWAPGPGEELFRAAEDA-----LPR--LIAEDLGFIITPDVVRL  
AEA11843.1 AAYWEVPAGEKTAVNGRWVPPAPGGELLERARDE---LGGLK--IIAEDLGFIITPDVVRL  
ABO08194.1 AAYWEVPAGEPTAAGRWVPPGPGRDLFDDAAAAE---VDLGR--LVAEDLGFIITPDVEEL  
ABP49821.1 VAYWEVPAGEKTAVNGRWVPPAPGAELLEKARSE---LGELR--LIAEDLGFIITPDVVRL  
AFA40300.1 AAYWEVPAGEKTAVNGRWVPPAPGAELLEKARAE---LGELR--LIAEDLGFIITPDVVRL  
AAL63326.1 VAYWEVPGGETTAVRGRWAPSPGRRLFEEAAAAA---VDLGR--LIAEDLGFIITPEVEAL  
NP 559144.1 VAYWEVPGGETTAVRGRWAPSPGRRLFEEAAAAA---VDLGR--LIAEDLGFIITPEVEAL  
AET33957.1 LAYWEIPGGETTAARGRWAPSPGKRLFDAAASAA---VELGR--LIAEDLGFIITPDVEAL  
ABD40312.1 VGFWIEIRAGSDTAIDGRWISAPVWDLRLTWTKK---FPCFP--VIAEDLGFIITPDVREV  
QXO95450.1 VGYWEIKAGSDTAIDGRWISAPVWDLRLTWTKK---FPCFP--VIAEDLGFIITPDVREV  
QVV87979.1 VQYWEVPVDEMTEANGRWVDPGRDLFTLLARS---RSCLP--IIAEDLGFIITSDVHEM  
CCJ37196.1 VQYWEVPAGEKTAVNGRWVDPGRDFFFTLLARS---RSCLP--IIAEDLGFIITSDVHEM  
SAI88308.1 VQYWEVPAGEKTAVNGRWVDPGRDFFFTLLARS---RSCLP--IIAEDLGFIITSDVHEM  
CVK34217.1 VQYWEVPAGEKTAVNGRWVDPGRDFFFTLLARS---RSCLP--IIAEDLGFIITSDVHEM  
BBL68280.1 VQYWEVPAGEKTAVNGRWVDPGRDFFFTLLARS---RPCLP--IIAEDLGFIITPDVHEM  
ABN57193.1 VQFWEVPAGEETARNGHWVDPGRDLFTLLARS---RSCLP--IIAEDLGFIITPDVHEM  
SAI88240.1 ADYWEVPAGDATAEHGTWVDGPGGFFGVLARQ---FPCFA--IVAEDLGANTPAVQGL

CVK34142.1 ADYIEVVPAGDATAEHGTWVDGPGGFFGVLARQ---FPCFA--IVAEDLGANTPAVQGL  
CCJ37132.1 ADYIEVVPAGDATAEHGAWVDGPGPEFFFEVLARQ---FPCFA--IVAEDLGANTPAVQGL  
BBL68006.1 ADYIEIPAGDPTAEHGTWVDGPGAGFFFEALVRK---HPCFA--IVAEDLGANTPAVQAL  
ABN56987.1 ADYIEVVPAGDATAERGTWVDGPGEDFFEALARK---HPCFP--IVAEDLGANTPAVQAL  
: : \* \* \* .: . \*: \*

AUV80673.1 RTRYGLASLKLFPVDWC-EEDHPHKPHRYTADTVAYTSTHDSSETARGAYES-LSDEQRA  
QCC51341.1 RDTLGYPGMVVAADFADWC-DGDSRYHPANYDANSVAYTSTHDTDTVVGWYDA-LDEQDRE  
QSG15659.1 REDLGYPGMNVAADFADWC-DGDSRYHPSSYDENSVAITSTHDTDTVAGWYAD-LDEQDRE  
QSG11910.1 RDDLGYPGMNVAADFADWC-DGDSRYHPVITYDENSVAITSTHDTDTLVGWYED-LDDRQLD  
QSG08987.1 RDDLGYPGMNVAADFADWC-DGDSRYHPVITYDENSVAITSTHDTDTLVGWYED-LDDRQLD  
QSG05483.1 RDDLGYPGMNVAADFADWC-DGDSRYHPVITYDENSVAITSTHDTDTLVGWYED-LDDRQLD  
QGN07616.1 RDAFEFFPGMSVAAMADWC-DPSQGHHPASYTENTVAYASTHDTDTVPGWYAS-LSDAQRE  
QSG11921.1 RDAFGFPGMRVAGMADWC-DDDHTHHPANYDDSVAYASTHDTSTTPGWYED-LSETQKQ  
QSG08998.1 RDAFGFPGMRVAGMADWC-DDDHTHHPANYDDSVAYASTHDTSTTPGWYED-LSETQKQ  
QSG05496.1 RDAFGFPGMRVAGMADWC-DDDHTHHPANYDDSVAYASTHDTSTTPGWYED-LSETQKQ  
CCQ33055.1 RDAFGFPGMRVAGMADWC-DAESTHHPASYDEPSVAYTSTHDTSTTPGVWVKD-LSKKQRE  
QSG02731.1 RRDIDAPGMKVMQYADWC-SEDHIYLPHTYEEDTVAYPGTHDNTNVRGWYEA-LEDEQVD  
AUX01232.1 RRELGFPGMRVQYADWC-TEDHGYQPHYAADSVAYPSTHDTDTVCGYEA-LGEDQVD  
QFU81686.1 RQSIGAPGMRVLQYADWC-TEDHRYQPHVYEDSVAYPATHDNTNVRGWYEA-LGEDQVD  
AWB27107.1 RDRFEFFPGMRVPHYADWC-AERHRHKPAGYERSVAYTSTHDTNTARGYVES-LDDRQRS  
QLC34969.1 RDHLGFPGMRVPEYADWC-AEHHRYPKSDYPRDCVAYTSTHDTDTAVGYYES-LGERQDR  
ACV11232.1 RDRFEFFPGMRVPHYADWC-REGHRYKPTVYPDHCVGYTSTHDTDTAVGYFYEK-LSAEQDR  
QPV62520.1 RDRFEFFPGMRVPHYADWC-AETDRYKPATYPRQSVGYTSTHDTDTAVGWYYES-LSEEQDR  
QLH84085.1 RDRFEFFPGMRVPHYADWC-AETDRYKPATYPRQSVGYTSTHDTDTAVGWYYES-LSAEQDR  
QLH79093.1 RDRLEFFPGMRVPHYADWC-AETDRYKPATYPRQSVGYTSTHDTDTAVGWYYES-LSAEQDR  
QAU11732.1 MAEFGFPGMRVQYADWC-AEGNEYQPMHYSEGTVGYTSTHDTDTWAGYFDD-LPAEQDR  
QAY20111.1 MAEFGFPGMRVQYADWC-AEGNEYQPMHYSEGTVGYTSTHDTDTWAGYFED-LPAEQDR  
QWC20591.1 MAEFGFPGMRVQYADWC-AEGNEYQPMHYGEDVGYTSTHDTDTWVGYFGD-LPAEQDR  
QUO46499.1 MAEFGFPGMRVQYADWC-AEGNEYQPIHYEGVGYTSTHDTDTWAGYFED-LPAEQDR  
QKG93724.1 MAEFGFPGMRVQYADWC-AEGNQYQPMHYSEGTVGYTSTHDTDTWVGYFED-LPPEQDR  
QKY17977.1 MAEFGFPGMRVQYADWC-QEGNPYQPMHYSEGTVGYTSTHDTDTWVGYFED-LPERQDR  
ACM57093.1 MVEFGFPGMRVQYADWC-AEGNQYQPMHYSEGTVGYTSTHDTDTWVGYFEG-LPERQDR  
AZQ14643.1 MAEFGFPGMRVQYADWC-AEGDQYQPMHYSEGTVGYTATHDTNTWVGYFES-LPERQDR  
MDRFDFFPGMRVQYADWC-QGNEHQPMHYPKNSVGYTSTHDTDTFDGYQT-LSERQDR  
ABQ75827.1 RESLNFFPGMRVQYADWC-QEGDMYQPMHYPRQCVAYTATHDTNTTVGYYS-LSARQDR  
QZX99028.1 REAFDLPGMRVQYADWC-QQGHMYQPMHYPEDCVAYTSTHDTDTAVGYYES-LDDRQDR  
QZP38174.1 REAFDLPGMRVQYADWC-QQGHMYQPMHYPEDCVAYTSTHDTDTAVGYYES-LGDRQDR  
QZY03180.1 REAFDLPGMRVQYADWC-QQGHMYQPMHYPEDCVAYTSTHDTDTAVGYYES-LGDRQDR  
AUG48211.1 RDQFGFPGMRVQYADWC-EEGHMYQPMHYPEASVGYTSTHDTDTIVGYRG-LSDRQDR  
AEM58055.1 RDRFGFPGMRVQYADWC-EEGHMYQPMHYPEASVGYTSTHDTDTIVGYRD-LADRQDR  
AHE66799.1 RDRFGFPGMRVQYADWC-EEGHMYQPMHYPEASVGYTSTHDTDTIVGYRD-LADRQDR  
AJF25101.1 RDRFGFPGMRVQYADWC-EEGHMYQPMHYPEASVGYTSTHDTDTIVGYRD-LADRQDR  
AAV46825.1 RDEFGFPGMRVQYADWC-EEGHMYQPMHYPEASVGYTSTHDTDTIVGYRD-LADRQDR  
QCP91534.1 RDEFGFPGMRVQYADWC-EEGHMYQPMHYPEASVGYTSTHDTDTIVGYRD-LADRQDR  
QUJ72368.1 RDEFGFPGMRVQYADWC-EEGHMYQPMHYPEASVGYTSTHDTDTIVGYRD-LADRQDR  
UBZ54001.1 REYDFDFPGMRVPHYADWC-REGDMYQPMHYPPQSVAYSSHTDNTIVGYYS-LSQSQRD  
CCC40696.1 REHFNFFPGMRVPHYADWC-HEGNMYQPMHYPAQSVAYSSHTDNTIVGYYS-LSHSQRD  
CAJ52690.1 REHFNFFPGMRVPHYADWC-HEGNMYQPMHYPAQSVAYSSHTDNTIVGYYS-LSHSQRD  
QCJ48434.1 RDHFEFFPGMRVPHYADWC-REGDMNQPMHYPHGISGYTATHDTDTTVGYYS-LPDDQTD  
AHZ21176.1 RDRFAFPGMRVQYADWC-REGDMYQPMHYPEASVAYTSTHDTDTFVGYYQS-LDDHTRD  
AFK19479.1 RDRFAFPGMRVQYADWC-REGDMYQPMHYPEASVAYTSTHDTDTFVGYYQS-LDDHTRD  
AFK19479.2 RDRFAFPGMRVQYADWC-REGDMYQPMHYPEASVAYTSTHDTDTFVGYYQS-LDDHTRD  
QCQ75940.1 RDRFAFPGMRVQYADWC-REGDMYQPMHYPEASVAYTSTHDTDTFVGYYQS-LDDHTRD  
AKU07735.1 RDRFAFPGMRVQYADWC-SEGDMYQPMHYPEASVAYTSTHDTDTFVGYYRD-LDDRTRD  
QOS11852.1 RDRFAFPGMRVQYADWC-SEGDMYQPMHYPEASVAYTSTHDTDTFVGYYRD-LDDRTRD  
QIB78738.1 RDRFAFPGMRVQYADWC-REGDMYQPMHYPESSVAYTSTHDTDTFVGYYRD-LDDRTRD  
ADE05003.1 RDRFAFPGMRVQYADWC-REGDMYQPMHYPESSVAYTSTHDTDTFVGYYRD-LDDRTRD  
ADE05003.2 RDRFAFPGMRVQYADWC-REGDMYQPMHYPESSVAYTSTHDTDTFVGYYRD-LDDRTRD  
QCC48543.1 RERFGFPGMRVPHYADWC-QEGDMYQPMHYPEASVAYSSHTDNTLVGYCEN-LSDRQRS  
ADQ67101.1 RDRFGFPGMRVQYANWC-QEGDMYQPMHYPEASVGYTSTHDTNTFVGYYRD-LPADQKD  
QIQ76396.1 RDRFGFPGMRVQYANWC-QEGDMYQPMHYPEASVGYTSTHDTNTFVGYYRD-LPADQKD  
QIB74651.1 RDRFGFPGMRVQYANWC-QEGDMYQPMHYPEASVGYTSTHDTNTFVGYYRD-LPADQKD  
AIF04697.1 RKQNGIPGMAVLHFSND--DVDNPHNPHENHSEDVVTGTGHDNDTIVGWGGKP-----  
AIF05955.1 RKQNGIPGMAVLHFSND--DVDNPHNPHENHSEDVVTGTGHDNDTIVGWGGKP-----  
QEE14682.1 RDKFNFFPGMKILQFAFGS-DEENPYLPHNFVHNCISYTGTHDNNTLVGWQNDATKTEKK  
ADL19304.1 RDRGLGLPGLKVLQFAWDG-NPGNPYKPHNYGRNFVVTGTGHDNDTIVGWFFHEASPRARR  
AMD30778.1 RERGLGLPGLKVLQFAWDG-SPNNPYLPHNYARNFIVYTGTHDNNTLVGWFFHEASPRARR  
AKT33963.1 RRRGLGIPGMRVLQFAWDG-NPANEHKPHNYERNLVAYTGTHDNNTLVGWWRDEAPPRARR  
ABL88479.1 RRRGLGIPGMRVLQFAWDG-NPANEHKPHNYERNLVAYTGTHDNNTLVGWWRDEETTPRSRR  
ACB39188.1 RYRLGIPGMRVLQFAWDG-NPANEHKPHNYERNLVAYTGTHDNNTLVGWWRDEETTPRSRR  
AEA11843.1 RDRFGLPGLKVLQFAWDG-NPANEHKPHNHVKNSVVTGTGHDNDTIVGWFFHEASPRARR  
ABO08194.1 RDSGLGLPGLKVLQFAWDG-NPANLHKPHNHVKNSLVYTGTHDNNTAVGWFFHEATPAVRR  
ABP49821.1 RDRFGLPGLKVLQFAWDG-NPANEHKPHNHVKNSVVTGTGHDNTAVGWYLEEATPRARR  
AFA40300.1 RDRFGLPGLKVLQFAWDG-NPANEHKPHNHVKNSVVTGTGHDNMAVGWYQEEATPRARR  
AAL63326.1 REELGLPGLKVLQFAWDG-NPANPHKPHNHVKNAVVYTGTHDNNTAVGWYKEEATARARR  
NP\_559144.1 REELGLPGLKVLQFAWDG-NPANPHKPHNHVKNAVVYTGTHDNNTAVGWYKEEATARARR  
AET33957.1 RDELGLPGLKVLQFAWDG-NPANPHKPHNHVKNSVVTGTGHDNTAVGWYQEEASPRARR



```

ABD40312.1 MREFMIPGMKVLVFAFSSPTGDNPYILHNIPKDSVVYTGTHDNTPVRGWYELDATHEEKQ
QXO95450.1 MREFDIPGMKVLIFAFSSSETGDNPYILHNIPPNTVVYTGTHDNTPVLGWFLHEATPEEKQ
QVV87979.1 MREFDIPGMKVLIFAFSSSETGDNPYILHNIPPNTVVYTGTHDNTPVLGWFLHEATPEEKQ
CCJ37196.1 MAHFGFPGMKVLIFGFGSDVARNPHAPHNITGGCIAYTGTGTHDNTVRGWFEHEVSGDQRD
SAI88308.1 MAHFGFPGMKVLIFGFGSDVARNPHAPHNITGGCIAYTGTGTHDNTVRGWFEHEVSGEQRD
CVK34217.1 MAHFGFPGMKVLIFGFGSDVARNPHAPHNITGGCIAYTGTGTHDNTVRGWFEHEVSGEQRD
BBL68280.1 MAYFGFPGMKILIFGFGSDVAQNPHAPHNFAKGYVAYTGTHDNTVRGWFEHETSEEQKN
ABN57193.1 MAYFGFPGMKILTFFGFGSDVAQNPHAPHNITEGSAVYTGTHDNTVRGWFGREVDDQKN
SAI88240.1 LDRFGFPGMKILLFAFGEGLPESAHIPHNYPNLI CYTGTGTHDNTARGWFEEASEEDKQ
CVK34142.1 LDRFGFPGMKILLFAFGEGLPESAHIPHNYPNLI CYTGTGTHDNTARGWFEEASEEDKQ
CCJ37132.1 LDRFGFPGMKILLFAFGEGLPESAHIPHNYPNLI CYTGTGTHDNTARGWFEEASEEDKQ
BBL68006.1 LDRFDFPGMKILLFAFGEGIAGSAHIPHNYPNLI CYTGTGTHDNTARGWFEEASEEDKE
ABN56987.1 LDRFDFPGMKILLFAFGEGIARTPHIPHNYPNLI CYTGTGTHDNTARGWFEEASEEDKE

```

```

. : :
: * .***. *

```

```

AUV80673.1 CFEAYFDGPVAAETVHETCIEAVWGSEANLALAQIQDVLGRGNearFNVPGTTAGNWAWR
QCC51341.1 CLHYAV-DHEGGD-VHWDILDTVWNSDSVIALAQVQDPLGYGSEARFNVPGTVEGNWAWR
QSG15659.1 CLHYAV-DYEGGD-VHWDILDTIWGSDSVITLAQVQDPLGYGSDARFNVPGTEEDNWAWR
QSG11910.1 CLHYAV-DYEGGD-VHWDILDTVWGSDSAITLAQVQDPLGYGSEARFNVPGTEEGNWSWR
QSG08987.1 CLHYAV-DYEGGD-VHWDILDTVWGSDSAITLAQVQDPLGYGSEARFNVPGTEEGNWSWR
QSG05483.1 CLHYAV-DYEGGD-VHWDILDTVWGSDSAITLAQVQDPLGYGSEARFNVPGTEKGNWSWR
QGN07616.1 CLHDVV-DGNSDD-PHNWIVETIWASEAVLTLVQCQDGLLGLTAHRFNVPGTAEGNWEWR
QSG02731.1 CLHSVV-DHEGDE-VHWDIEAVWASPAITLAQFQDFLGLGDEHRFNLPGTATGNWKWR
QSG08998.1 CLHSVV-DHEGGE-VHWDIEAVWASPAITIAQFQDFLGLGDEHRFNLPGTATGNWKWR
QSG05496.1 CLYFAV-DHEGGP-INWDVIETVWETPAVITFAQFQDFHGLGDEHRFNLPGTATGNWKWR
CCQ33055.1 CLHYVL-GSDGSE-IHWDIERAWHTASSLAVVLPQDLYLGLGAEARFNPGTESGNWWR
QSG02731.1 CLHYVM-GTDGSE-IHWEFIEAAWGSDSVFAVAPLPDLFLGLGSEARFNPGTADGNWEWR
QFU81686.1 CLHYVL-STDGHE-IHWEFIEAAWESDAVFAITPLPDLGLDGEARFNPGTADGNWWR
AWB27107.1 CLEYAL-ATDAE-RAVWDLLEAVWQSDAALAIAPVQDLLDLGSESRLNDPAGG-DDWTWR
QLC34969.1 CFYDAL-DFDGDSPAWALLDAVWDSAPVAMTTLPLDLLGLGSDARLNPGTGTGNWWR
ACV11232.1 CLEYAL-ATDGD-SIAWDLIEAVWSDAALAMTTVPDLLEGRSDARLNQPGTGEGNWTWR
QPV62520.1 CLHYAL-ATDGE-RVWDLIEAVWSDAALALTTVPDLLELGSEARFNVPGTAEGNWRWR
QLH84085.1 CLHYAL-ATDGE-RIAWDLIEAVWSDAALALTTVPDLLELGSEARFNVPGTAENNRWR
QLH79093.1 CLHYAL-ATDGE-RIAWDLIEAVWSDAALALTTVPDLLELGSEARFNVPGTAEGNWRWR
QAU11732.1 CFYRNV-GAGPDEPVEWAIIVDEVWASDAILAVTTTLQDGLLGLGSEARFNPGLTAGNWEWR
QAY20111.1 CFYRNV-GSDPDEPPEWAIIDEVWSSDAILAVATTIQLDGLLGLGSEARFNPGLTAGNWEWR
QWC20591.1 CFYRNV-GSDPDEPTEWAIIDEVWSSDAILAVTTVQDGLLGLGSEARFNPGLTAGNWEWR
QUO46499.1 CFYRNV-GSDPDEPPEWAIIDAVWGSDAILAVTTTLQDGLLGLGSEARFNPGLTAGNWEWR
QKG93724.1 CFYRNV-GADGDRPEWEIIDEVWGSSEAVLAMTTVQDGLLGLGSEARFNPGLTAGNWEWR
QKY17977.1 CFYRNV-GADGDRPEWEIIDEVWASEAVLAMTTVQDGLLGLGSEARFNPGLTAGNWEWR
ACM57093.1 CFYRNV-GADGDRPEWEIIDEVWASEAVLAMTTVQDGLLGLGSEARFNPGLTAGNWEWR
AZQ14643.1 CFYRNV-GADGDRPEWEIIDEVWASDAVLAFTTQDGLLGLGSEARFNPGLTAGNWEWR
ATW89261.1 CLQYNL-GVDGSE-INWSMIEAVWRSDAVLAFTTQDGLLGLDSEARFNPGLTAGNWEWR
ABQ75827.1 CLHYNL-GIDGHE-INWSLIDAVWRSDAI IAMTTMQDILGLDSEARFNPGLTAGNWEWR
QZX99028.1 CLHYNL-GTDGVD-IEWDLVEAVWNSSEATLAVTTVQDGLLGLDSEARFNPGLTAGNWEWR
QZP38174.1 CLHYNL-GTDGVE-IEWDLVEAVWNSSEATLAVTTMQDGLLGLDSEARFNPGLTAGNWEWR
QZY03180.1 CLHYNL-GTDGVE-IEWDLVEAVWNSDAVLAFTTQDGLLGLDSEARFNPGLTAGNWEWR
AUG48211.1 CLHYNL-GTDGDE-INWDLIEAVWNSNAVAMTTMQDGLLGLSDARFNVPGTATGNWQWR
AEM58055.1 CLHYNL-GTDGDE-INWDLIEAVWNSNAVAMTTMQDGLLGLSDARFNVPGTATGNWQWR
AHB66799.1 CLHYNL-GTDGDE-INWDLIEAVWNSNAVAMTTMQDGLLGLSDARFNVPGTATGNWQWR
AJF25101.1 CLHYNL-GTDGDE-INWDLIEAVWNSNAVAMTTMQDGLLGLSDARFNVPGTATGNWQWR
AAV46825.1 CLHYNL-GTDGDE-INWDLIEAVWNSNAVAMTTMQDGLLGLSDARFNVPGTATGNWQWR
QCP91534.1 CLHYNL-GTDGDE-INWDLIEAVWNSNAVAMTTMQDGLLGLSDARFNVPGTATGNWQWR
QUJ72368.1 CLHYNL-GTDGDE-INWDLIEAVWNSNAVAMTTMQDGLLGLSDARFNVPGTATGNWQWR
UBZ54001.1 CLHYNL-GVDGSE-INWSIIDAVWRSDAQIGFTTLQDILGLDSEARFNPGLTAGNWEWR
CCC40696.1 CLHYNL-GVDGSE-INWSIIDAVWRSDAQIGFTTLQDILGLDSEARFNPGLTAGNWEWR
CAJ52690.1 CLHYNL-GVDGSD-INWSLIEAVWNSSEAVLAMTTVPDLGLGSEARFNPGLTAGNWSWR
AHZ21176.1 CLHYNI-GADGSE-IHWSIIDAVWNSASVLAFTTQDGLLGLDSEARFNPGLTAGNWEWR
AFK19479.1 CLHYNI-GADGSE-IHWSIIDAVWNSASVLAFTTQDGLLGLDSEARFNPGLTAGNWEWR
AFK19479.2 CLHYNI-GADGSE-IHWSIIDAVWNSASVLAFTTQDGLLGLDSEARFNPGLTAGNWEWR
CCQ75940.1 CLHYNI-GADGSE-IHWSIIDAVWNSASVLAFTTQDGLLGLDSEARFNPGLTAGNWEWR
AKU07735.1 CLHYNI-GADGSE-IHWSIIDAVWNSASVLAFTTQDGLLGLSDARFNPGLTAGNWEWR
QOS11852.1 CLHYNI-GADGSE-IHWSIIDAVWNSASVLAFTTQDGLLGLSDARFNPGLTAGNWEWR
QIB78738.1 CLHYNI-GADGSE-IHWSIIDAVWNSASVLAFTTQDGLLGLSDARFNPGLTAGNWEWR
ADE05003.1 CLHYNI-GADGSE-IHWSIIDAVWNSASVLAFTTQDGLLGLSDARFNPGLTAGNWEWR
ADE05003.2 CLHYNI-GADGSE-IHWSIIDAVWNSASVLAFTTQDGLLGLSDARFNPGLTAGNWEWR
QCC48543.1 CLEYNI-GADGSE-LHWSMIEAVWRADSVLAFTTQDVLGLDEHARFNRPGTSGNWSWR
ADQ67101.1 CLHYNI-GADGSE-IHWSIIDAVWNSNAVIAFTTQDILGLGAEARFNVPGTDTGNWRWR
QIQ76396.1 CLHYNI-GADGSE-IHWSIIDAVWNSNAVIAFTTQDILGLGAEARFNVPGTDTGNWRWR
QIB74651.1 CLHYNI-GADGSE-IHWSIIDAVWNSNAVIAFTTQDILGLGAEARFNVPGTDTGNWRWR
AIF04697.1 -----VQDLIQDALNSPANLAIIPLDQVMGLDSQARMNTPGTLDGNWEWG
AIF05955.1 -----VQDLIQDALNSPANLAIIPLDQVMGLDSQARMNTPGTLDGNWEWR
QEE14682.1 NLREYLNTKSENKSVVDDLIRILYRSIAKVAIIPIDLLGQGEARMNTPSVEGGNQWYQ
ADL19304.1 EAMNYMGLR-DAREINWAFIRLAMMSVADVSIFPQDVLGLGPEARMNTPGTVGNNWRWR
AMD30778.1 QALRYMGLN-SARDINWAFIRLAMMSVADVSIFPAQDVLGLGPEARMNTPGTVSNNWLWR
AKT33963.1 EALAYMGGC-R-GAVNWCFIRLLFSTVADVAVVPIDQDVLGLGAEARINKPATSRGNWKWR

```

ABL88479.1 EALAYIGGC-G-REINWCFIRLLFSTVADVAVVPIQDVLGLGSEARINKPGTLRGNWKWK  
ACB39188.1 EALAYMGGC-R-GGVSWCFIRLLFSTVADVAVVPMQDALGLGSEARMNKPGTARGNWKWR  
AEA11843.1 EALEYMGRR-SAKDIHWAIFRLAYFSVADVAVVPMQDFMGLGPEARINRPGTRGGNWWWR  
ABO08194.1 EVLKYGNCR-P-REINWCLIRLAHMSVADVAIVPMQDVLGLGSEARMNKPGTVGGNWRWR  
ABP49821.1 EFCQYAKCS-AAEGVHWCFIRLAYMSVANVAIVPIQDVLGLGSEARMNKPGTVGGNWRWR  
AFA40300.1 EFREYAKCA-SGEGVNWCFIRLAHMSVADVAIVPMQDVLGLGSEARMNKPGMTMGGNWRWR  
AAL63326.1 EFKEYSNCA---GEVHWCFIKLAHMSVANVAIVPQDILLGLGSEARMNRPGTVGGNWKWR  
NP\_559144.1 EFKEYSNCA---GEVHWCFIKLAHMSVANVAIVPQDILLGLGSEARMNRPGTVGGNWKWR  
AET33957.1 EFRQYSNCR---EAVNWCFIKLAYMSVADVAVVPMQDVLGLGSEARMNRPGTVGGNWRWR  
ABD40312.1 RLIAYLGREPEIHEISDIFIRLAMSSANTAIIPQDILGLDSSARMNKPGEHGNWRWR  
QXO95450.1 RFVSYIGYEVSSSEKVSDFVRLAMSSANTAIISMQDVLGLDISARMNRPGEKGNWRWR  
QVV87979.1 RFVSYIGYEVSSSEKVSDFVRLAMSSANTAIISMQDVLGLDISARMNRPGEKGNWRWR  
CCJ37196.1 LLFRYIGGTFGADHAHRLIRLAMLSPAETVIVPMQDILGLGSEARMNRPGTAEGNWEWR  
SAI88308.1 LLFRYIGGSFGEAEHVHRLIRLAMLSPAETVIVPMQDILGLGSEARMNRPGTAEGNWEWR  
CVK34217.1 LLFRYIGGSFGEAEHVHRLIRLAMLSPAETVIVPMQDILGLGSEARMNRPGTAEGNWEWR  
BBL68280.1 LLFRYIGGSVSGDQVHRILIRLAMLSPADTVIVPMQDILGLGSEARMNRPGTTEANWEWR  
ABN57193.1 LLFRYIGGPFVSGDEIHRILIRLAMLSPADTVIVPMQDILGLGSEARMNRPGTTEGNWEWR  
SAI88240.1 RFFAYIGREVTAEVPRELIRLAMTSVARTSIIPMQDILGLGAAARMNYPSTSDGNWEWR  
CVK34142.1 RFFAYIGREVTAEVPRELIRLAMTSVARTSIIPMQDILGLGAAARMNYPSTSDGNWEWR  
CCJ37132.1 RFFAYIGREVADEVPRELIRLAMTSVARASIIPMQDILGLGAAARMNYPSTSDGNWEWR  
BBL68006.1 RFFAYAGREVRADSVHREFVRLGMTSVARACIVPMQDVLGLGAAARMNYPSTTTGNWEWR  
ABN56987.1 RFFTYIGREVADEVHRELVRLAMTSVARACIVPMQDVLGLGAAARMNYPSTTTGNVWWR

: : : . \* . \* : \* . : \* :

AUV80673.1 VREEQLTD-AAAGWLAEATRDANR-----  
QCC51341.1 VSEDALSG-DVVQNLVDITEESDRLAE----  
QSG15659.1 VSEDALSA-DVAERLYEITESSGRLTD----  
QSG11910.1 VSEDALTD-EVAQRLYDITEATGRLTD----  
QSG08987.1 VSEDALTD-EVAQRLYDITEATGRLTD----  
QSG05483.1 VGEDALTD-EVAQRLYDITEATGRLTD----  
QGN07616.1 VLPSELTD-DVAERLAAVSRRTDRA-----  
QSG11921.1 MRRSELDP-AVAERLADVTRRTDRR-----  
QSG08998.1 MRRSELDP-AVAERLADVTRRTDRR-----  
QSG05496.1 MRRSELDP-AVAERLADVTRRTDRR-----  
CCQ33055.1 MLDSELDS-AVADRLADVTRKADRT-----  
QSG02731.1 CTDELL-ESFPTDRLRTITDEADR-----  
AUX09035.1 CPAALITAEFPTERLRAVTDGTDRTVLN---  
QFU81686.1 LSTDRL-ESFPTARLRELARTDRLDDETTSH  
AWB27107.1 LPAGALDD-ALADRLRATTDAALR-----  
QLC34969.1 VDEGALAD-DLAARLADV TANARR-----  
ACV11232.1 VTADELDA-DTADRLAAVTRASLR-----  
QPV62520.1 VTADQLDP-DVADELAVTAATLR-----  
QLH84085.1 VTADQLDP-AVAGELAGVTAATLR-----  
QLH79093.1 VTADRLDP-AVADELAVTAATLR-----  
QAU11732.1 VTREALDD-AIADRLWELAGDHVR-----  
QAY20111.1 VARDLDD-AIADRLWELAGKHVR-----  
QWC20591.1 VSRDALDD-AIADRLWELGGTHVR-----  
QUO46499.1 VARDALDD-EIADRLWELSGKHVR-----  
QKG93724.1 VARDALDD-EIADRLWELGGRHVR-----  
QKY17977.1 VTRDALDD-AVADRLWDLAGRHRV-----  
ACM57093.1 VRRDALDD-AIADRLWDLAGRHRV-----  
AZQ14643.1 VRREALDD-DIADRLFELAGRHRV-----  
ATW89261.1 VTSEGLDE-RIAKKLGTMTAIEIR-----  
ABQ75827.1 CTSEGLSD-ALAGRLAALSAEHIRD-----  
QZX99028.1 VTEAGLDG-AVADRLARITDATVR-----  
QZP38174.1 VTEDGLND-AVAERLARITDATVR-----  
QZY03180.1 VTEDGLND-AVAERLARITDATVR-----  
AUG48211.1 VTDAALDA-DVAERLRRVTDRTIR-----  
AEM58055.1 VTEDAIND-EVAERLRQVTDRTIR-----  
AHB66799.1 VTEDAIND-EVAERLRQVTDRTIR-----  
AJF25101.1 VTEDAIND-EVAERLRQVTDRTIR-----  
AAV46825.1 VTD TALDA-DIAERLRRVTDRTIR-----  
QJP91534.1 VTD TALDA-DIAERLRRVTDRTIR-----  
QUJ72368.1 VTEDALDT-DVAERLRQVTDRTIR-----  
UBZ54001.1 CTDSGLDE-DLARRLAGLTIEHVRD-----  
CCC40696.1 CTDSGLDD-DLARRLAGLTIEHVRD-----  
CAJ52690.1 CTDSGLDD-DLARRLAGLTIEHVRD-----  
QCJ48434.1 CTYEGLE-DSAERLRDVTDFRTIR-----  
AHZ21176.1 VTREGLDD-DVSARLAELTDLHIRN-----  
AFK19479.1 VTREGLDD-DVSARLAELTDLHIRN-----  
AFK19479.2 VTREGLDD-DVSARLAELTDLHIRN-----  
QCQ75940.1 VTREGLDD-DVSARLAELTDLHIRN-----  
AKU07735.1 VTREGLDD-GVADRLANLTDLHIRN-----  
QOS11852.1 VTREGLDD-GVADRLANLTDLHIRN-----  
QIB78738.1 VTREGLDD-GVADRLASLTDLHIRN-----  
ADE05003.1 VTREGLDD-GVADRLASLTDLHIRN-----  
ADE05003.2 VTREGLDD-GVADRLASLTDLHIRN-----  
QCC48543.1 CTVEAFSE-ALADRLARLTDEHIRN-----

|             |                                 |
|-------------|---------------------------------|
| ADQ67101.1  | CTEEGFDE-ELASRLARLTDEHIR-----   |
| QIQ76396.1  | CTEEGFDE-ELASRLARLTDEHIR-----   |
| QIB74651.1  | CTEEGFDE-ELASRLARLTDEHIR-----   |
| AIF04697.1  | FDWDELTN-DSLWFGQQVYRSGRGN-----  |
| AIF05955.1  | FDWDELTN-DSLWFGQQVYRSGRGN-----  |
| QEE14682.1  | VKIDNDVK-NRAKFLKKITKLYGRKVII--- |
| ADL19304.1  | LESFDGLR-RAARLRDMTRAYGR-----    |
| AMD30778.1  | LDSLEGLW-RTASRLRDMTRSYGR-----   |
| AKT33963.1  | LHAQPP-P-TYARLRRLAKLYGR-----    |
| ABL88479.1  | LAKDPP-I-NFAVLRRLAKLYGR-----    |
| ACB39188.1  | MAGDPP-R-AVAARLRRLARIYGR-----   |
| AEA11843.1  | MTELPG-R-ALARRIRRLARLYGR-----   |
| ABO08194.1  | LAEQPP-R-ALLRKLREVTRLTYGR-----  |
| ABP49821.1  | LAKMPN-A-AVRRRLRKLTRYGR-----    |
| AFA40300.1  | LAKMPD-A-AVLRRLRKLTRYGR-----    |
| AAL63326.1  | LGAQPE-P-RVWKRLRDVTRTYGR-----   |
| NP_559144.1 | LGAQPE-P-RVWKRLRDVTRTYGR-----   |
| AET33957.1  | MAKQPE-P-RQWRRLRSLARLYGR-----   |
| ABD40312.1  | LQERMISE-ELSRRLSELVKIYGR-----   |
| QXO95450.1  | MQERMITE-DLAYYIRTLTTYGRL-----   |
| QVV87979.1  | MQERMITE-DLAYYIRTLTTYGRL-----   |
| CCJ37196.1  | LRREQMRE-QAMQEFSEVTGLYGRK-----  |
| SAI88308.1  | LRREQMRE-QAMQEFSEVTGLYGRK-----  |
| CVK34217.1  | LRREQMRE-QAMQEFSEVTGLYGRK-----  |
| BBL68280.1  | LRPDQIGE-ESMRELAEVTGIYGRG-----  |
| ABN57193.1  | LRPDQAGE-ESMREFAEVTGIYGRG-----  |
| SAI88240.1  | MTPAEFAG-APFDRLRRLTELCGRA-----  |
| CVK34142.1  | MTPAEFAG-APFDRLRRLTELCGRA-----  |
| CCJ37132.1  | MTPREFAD-APFDRLGRFTELCGRA-----  |
| BBL68006.1  | MTPEEFAG-APFEWLRELTELTGRG-----  |
| ABN56987.1  | MTPEEFAG-APFEWLRLTELTGRG-----   |
|             | : *                             |

**Figure S2. Clustal alignment of Hw-A and 83 archaeal amylomaltases present in the CAZy GH77 family. Hw-A is reported in red.**

**Figure S3**

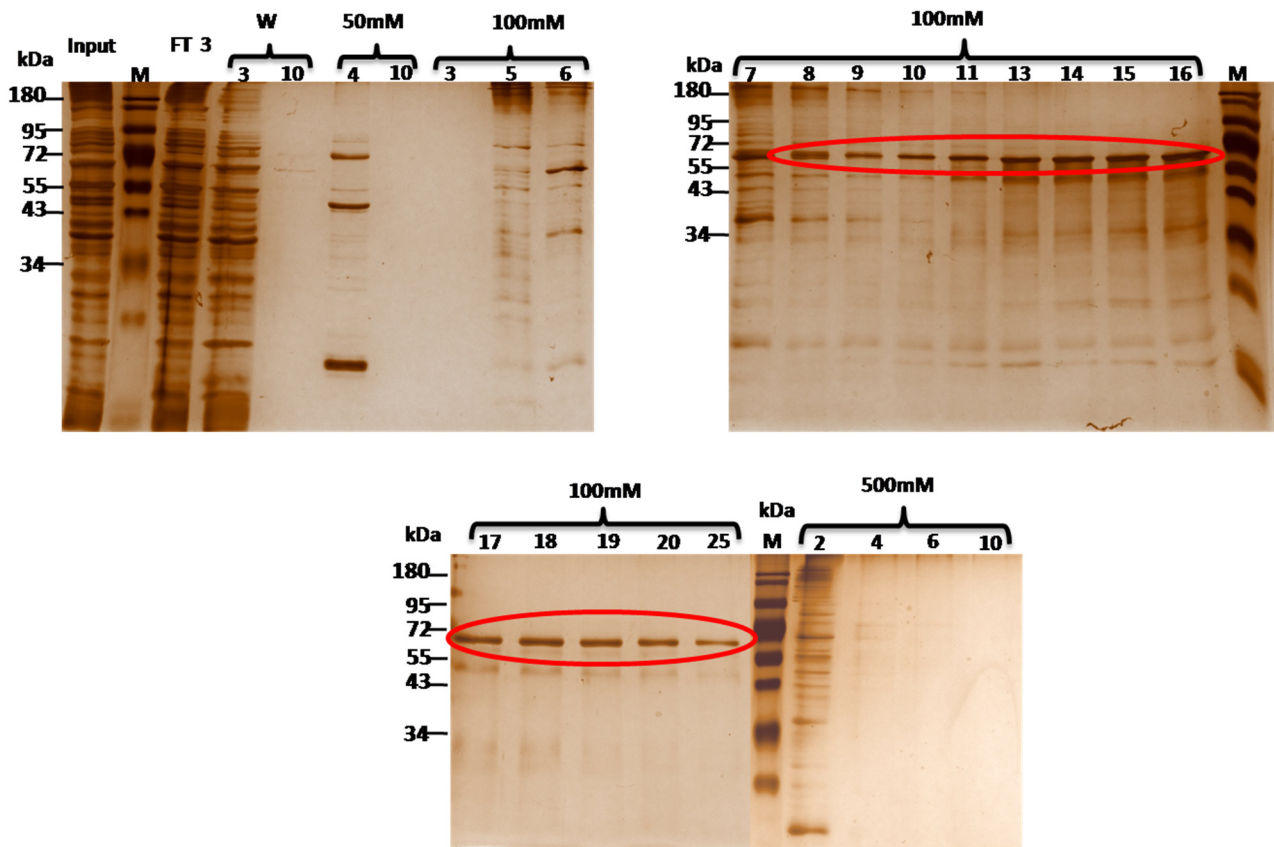

**Figure S3.** SDS-PAGE on 15% polyacrylamide gel of the fractions obtained from IMAC chromatography. Input: Soluble fraction of sonicated induced expression cells; M: Marker Thermo Scientific Page Ruler Prestained Protein Ladder; FT: flow-through; W: wash buffer; 50mM: fraction eluted with 50mM imidazole elution buffer; 100mM: fraction eluted with 100mM imidazole elution buffer; 500mM: fraction eluted with 500mM imidazole elution buffer. The recombinant protein was circled in red. Protein electrophoretic bands were revealed by silver staining.
